# Supplementary material for: Identification of Daphnane Diterpenoids from Wikstroemia indica Using Liquid Chromatography with Tandem Mass Spectrometry
Source: MDPI journal article supplement (doi:10.3390/plants12203620), 2023-10-19
Supplement: s1 [file s1]

Supporting Information

# **Identification of Daphnane Diterpenoids from *Wikstroemia indica* by Liquid Chromatography with Tandem Mass Spectrometry**

Mi Zhang<sup>1</sup>, Kouharu Otsuki<sup>1,\*</sup>, Reo Takahashi<sup>1</sup>, Takashi Kikuchi<sup>1</sup>, Di Zhou<sup>2</sup>, Ning Li<sup>2</sup>, and Wei Li<sup>2,\*</sup>

<sup>1</sup>Faculty of Pharmaceutical Sciences, Toho University, Miyama 2-2-1, Funabashi, Chiba 274-8510, Japan

<sup>2</sup>School of Traditional Chinese Materia Medica, Key Laboratory of Innovative Traditional Chinese Medicine for Major Chronic Diseases of Liaoning Province, Key Laboratory for TCM Material Basis Study and Innovative Drug Development of Shenyang City, Shenyang Pharmaceutical University, Shenyang 110016, P. R. China

# **Contents**

## **Spectroscopic data**

|                                                                                                                                                 |     |
|-------------------------------------------------------------------------------------------------------------------------------------------------|-----|
| Total ion chromatograms and extracted ion chromatograms in the positive ion mode from the E3-2 fraction, E3-3 fraction, and E3-4 fraction ..... | S1  |
| <sup>1</sup> H- and <sup>13</sup> C-NMR data of compounds <b>12, 15, 17, 18, 20, and 21</b> .....                                               | S2  |
| NMR spectra of compound <b>12</b> .....                                                                                                         | S6  |
| HRESIMS data of compound <b>12</b> .....                                                                                                        | S10 |
| NMR spectra of compound <b>15</b> .....                                                                                                         | S11 |
| HRESIMS data of compound <b>15</b> .....                                                                                                        | S13 |
| NMR spectra of compound <b>17</b> .....                                                                                                         | S14 |
| HRESIMS data of compound <b>17</b> .....                                                                                                        | S16 |
| NMR spectra of compound <b>18</b> .....                                                                                                         | S17 |
| HRESIMS data of compound <b>18</b> .....                                                                                                        | S19 |
| NMR spectra of compound <b>20</b> .....                                                                                                         | S20 |
| HRESIMS data of compound <b>20</b> .....                                                                                                        | S22 |
| NMR spectra of compound <b>21</b> .....                                                                                                         | S23 |
| HRESIMS data of compound <b>21</b> .....                                                                                                        | S25 |
| Product ion spectra of peaks <b>15 and 16</b> .....                                                                                             | S26 |
| Mass spectra and product ion spectra of peaks <b>3 and 21</b> .....                                                                             | S27 |
| Product ion spectra of peaks <b>6, 9, 10, 14, 17, and 19</b> .....                                                                              | S28 |
| Product ion spectra of peaks <b>5, 7, 18, and 20</b> .....                                                                                      | S29 |
| Product ion spectra of peaks <b>1, 2, 8, and 11</b> .....                                                                                       | S30 |
| Product ion spectra of peaks <b>4 and 13</b> .....                                                                                              | S31 |

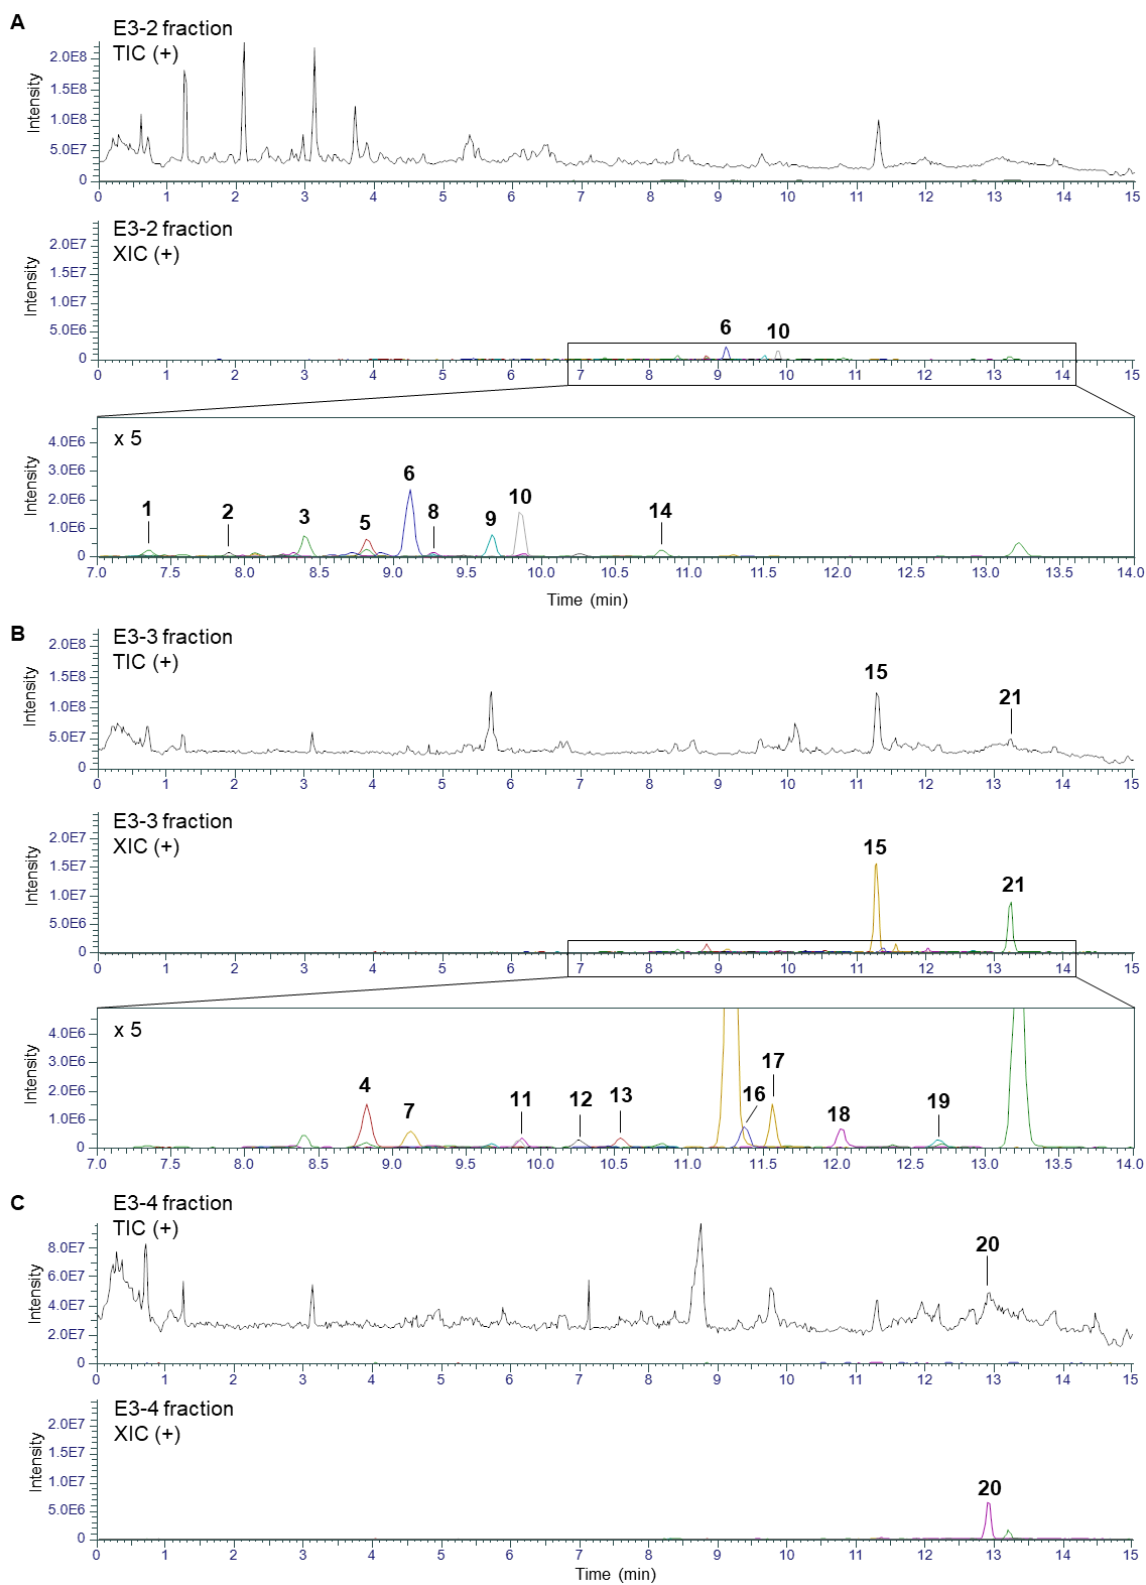

**Figure S1.** Total ion chromatograms and extracted ion chromatograms in the positive ion mode from the (A) E3-2 fraction, (B) E3-3 fraction, and (C) E3-4 fraction.

**Table S1.** <sup>1</sup>H (500 MHz) and <sup>13</sup>C (125 MHz) NMR data of compounds **15**, **21**, and **17** (CDCl<sub>3</sub>).

| <b>15</b> |                                                |                     | <b>17</b>                                            |                     | <b>21</b>                                      |                     |
|-----------|------------------------------------------------|---------------------|------------------------------------------------------|---------------------|------------------------------------------------|---------------------|
| no.       | $\delta_{\text{H}}$ ( <i>J</i> in Hz)          | $\delta_{\text{C}}$ | $\delta_{\text{H}}$ ( <i>J</i> in Hz)                | $\delta_{\text{C}}$ | $\delta_{\text{H}}$ ( <i>J</i> in Hz)          | $\delta_{\text{C}}$ |
| 1         | 7.59 (1H, dd, 2.5, 1.4)                        | 161.4               | 7.56 (1H, m)                                         | 160.5               | 7.61 (1H, dd, 2.6, 1.4)                        | 161.2               |
| 2         |                                                | 136.6               |                                                      | 136.9               |                                                | 136.7               |
| 3         |                                                | 209.9               |                                                      | 209.5               |                                                | 209.8               |
| 4         |                                                | 72.2                |                                                      | 72.2                |                                                | 72.3                |
| 5         | 4.23 (1H, s)                                   | 72.1                | 4.23 (1H, s)                                         | 72.2                | 4.23 (1H, s)                                   | 72.0                |
| 6         |                                                | 60.4                |                                                      | 60.4                |                                                | 60.4                |
| 7         | 3.41 (1H, s)                                   | 64.4                | 3.57 (1H, br s)                                      | 64.4                | 3.43 (1H, s)                                   | 64.2                |
| 8         | 2.88 (1H, d, 2.5)                              | 36.7                | 3.57 (1H, d, 2.5)                                    | 35.6                | 2.92 (1H, d, 2.6)                              | 36.7                |
| 9         |                                                | 78.7                |                                                      | 78.2                |                                                | 79.5                |
| 10        | 3.72 (1H, dq, 2.8, 2.5)                        | 48.2                | 3.81 (1H, q, 2.5)                                    | 47.5                | 3.79 (1H, dq, 2.9, 2.6)                        | 48.2                |
| 11        | 2.43 (1H, dq, 8.6, 7.2)                        | 34.8                | 2.47 (1H, q, 7.2)                                    | 44.2                | 2.46 (1H, dq, 8.6, 7.2)                        | 34.9                |
| 12        | 1.62 (1H, d, 14.3)<br>2.19 (1H, dd, 14.3, 8.6) | 36.5                | 5.09 (1H, br s)                                      | 78.4                | 1.66 (1H, d, 14.4)<br>2.22 (1H, dd, 14.4, 8.6) | 36.5                |
| 13        |                                                | 84.1                |                                                      | 83.8                |                                                | 84.4                |
| 14        | 4.34 (1H, d, 2.5)                              | 81.8                | 4.80 (1H, d, 2.6)                                    | 80.5                | 4.40 (1H, d, 2.5)                              | 82.0                |
| 15        |                                                | 146.3               |                                                      | 143.0               |                                                | 146.1               |
| 16        | 4.87 (1H, t, 1.4)<br>5.00 (1H, br s)           | 111.1               | 4.99 (1H, br s)<br>5.00 (1H, br s)                   | 113.6               | 4.89 (1H, t, 1.4)<br>5.00 (1H, br s)           | 111.3               |
| 17        | 1.76 (3H, s)                                   | 19.0                | 1.84 (1H, br s)                                      | 18.8                | 1.78 (3H, s)                                   | 18.9                |
| 18        | 1.14 (3H, d, 7.2)                              | 20.3                | 1.33 (1H, d, 7.2)                                    | 18.2                | 1.17 (3H, d, 7.2)                              | 20.4                |
| 19        | 1.78 (3H, dd, 2.8, 1.4)                        | 9.9                 | 1.77 (1H, m)                                         | 9.9                 | 1.79 (3H, dd, 2.9, 1.4)                        | 9.9                 |
| 20        | 3.75 (1H, d, 12.6)<br>3.86 (1H, d, 12.6)       | 65.3                | 3.75 (1H, dd, 12.5, 4.5)<br>3.95 (1H, dd, 12.5, 5.2) | 65.3                | 3.76 (1H, d, 12.5)<br>3.87 (1H, d, 12.5)       | 65.0                |
| 1'        |                                                | 119.4               |                                                      | 117.1               |                                                | 116.5               |
| 2'        | 1.93 (2H, m)                                   | 34.9                | 5.65 (1H, d, 15.4)                                   | 122.4               | 5.69 (1H, d, 15.5)                             | 122.8               |
| 3'        | 1.56 (2H, m)                                   | 23.5                | 6.66 (1H, dd, 15.4, 10.6)                            | 135.1               | 6.68 (1H, dd, 15.5, 10.6)                      | 138.9               |
| 4'        | 1.32 (2H, m)                                   | 29.6                | 6.04 (1H, dd, 15.1, 10.6)                            | 128.6               | 6.04 (1H, dd, 15.2, 10.6)                      | 134.7               |
| 5'        | 1.25 (2H, m)                                   | 29.6                | 5.85 (1H, dt, 15.1, 7.0)                             | 139.3               | 5.83 (1H, d, 15.2, 7.2)                        | 128.8               |
| 6'        | 1.25 (2H, m)                                   | 29.5                | 2.08 (2H, q, 7.0)                                    | 32.7                | 2.07 (2H, q, 7.2)                              | 32.7                |
| 7'        | 1.25 (2H, m)                                   | 29.3                | 1.37 (2H, hex, 7.0)                                  | 28.7                | 1.24 (2H, m)                                   | 31.9                |
| 8'        | 1.23 (2H, m)                                   | 31.9                | 1.27 (2H, m)                                         | 31.3                | 1.24 (2H, m)                                   | 29.6                |
| 9'        | 1.25 (2H, m)                                   | 22.7                | 1.27 (2H, m)                                         | 22.5                | 1.24 (2H, m)                                   | 29.5                |
| 10'       | 0.86 (3H, t, 7.0)                              | 14.1                | 0.87 (3H, t, 6.8)                                    | 14.0                | 1.24 (2H, m)                                   | 29.3                |
| 11'       |                                                |                     |                                                      |                     | 1.36 (2H, m)                                   | 29.1                |
| 12'       |                                                |                     |                                                      |                     | 1.36 (2H, m)                                   | 29.1                |
| 13'       |                                                |                     |                                                      |                     | 1.28 (2H, m)                                   | 22.7                |

|     |  |                    |                   |       |
|-----|--|--------------------|-------------------|-------|
| 14' |  |                    | 0.86 (3H, t, 6.9) | 14.1  |
| 1"  |  |                    |                   | 165.8 |
| 2"  |  | 6.35 (1H, d, 15.9) |                   | 117.3 |
| 3"  |  | 7.62 (1H, d, 15.9) |                   | 145.9 |
| 4"  |  |                    |                   | 134.1 |
| 5"  |  | 7.51 (2H, m)       |                   | 128.9 |
| 6"  |  | 7.37 (2H, m)       |                   | 128.3 |
| 7"  |  | 7.37 (2H, m)       |                   | 130.6 |
| 8"  |  | 7.37 (2H, m)       |                   | 128.3 |
| 9"  |  | 7.51 (2H, m)       |                   | 128.9 |

**Table S2.**  $^1\text{H}$  (500 MHz) and  $^{13}\text{C}$  (125 MHz) NMR data of compounds **12**, **18**, and **20** ( $\text{CDCl}_3$ ).

| <b>12</b> |                                                |                     | <b>18</b>                                      |                     | <b>20</b>                                      |                     |
|-----------|------------------------------------------------|---------------------|------------------------------------------------|---------------------|------------------------------------------------|---------------------|
| no.       | $\delta_{\text{H}}$ ( $J$ in Hz)               | $\delta_{\text{C}}$ | $\delta_{\text{H}}$ ( $J$ in Hz)               | $\delta_{\text{C}}$ | $\delta_{\text{H}}$ ( $J$ in Hz)               | $\delta_{\text{C}}$ |
| 1         | 2.97 (1H, t, 12.0)                             | 49.4                | 2.11 (1H, brt, 9.2)                            | 49.4                | 2.37 (1H, br t, 11.2)                          | 50.7                |
| 2         | 1.84 (1H, m)                                   | 37.6                | 1.69 (1H, m)                                   | 36.9                | 1.87 (1H, m)                                   | 36.3                |
| 3         | 4.91 (1H, d, 4.9)                              | 82.5                | 3.82 (1H) <sup>a</sup>                         | 79.6                | 5.06 (1H, 4.9)                                 | 83.0                |
| 4         |                                                | 79.5                |                                                | 79.3                |                                                | 80.1                |
| 5         | 4.08 (1H, s)                                   | 73.7                | 3.81 (1H) <sup>a</sup>                         | 71.6                | 4.09 (1H, br s)                                | 73.5                |
| 6         |                                                | 60.7                |                                                | 60.0                |                                                | 61.0                |
| 7         | 3.37 (1H, s)                                   | 63.5                | 3.35 (1H, s)                                   | 64.4                | 3.32 (1H, s)                                   | 64.2                |
| 8         | 3.04 (1H, d, 2.9)                              | 36.7                | 2.94 (1H, s)                                   | 36.6                | 2.87 (1H, d, 2.5)                              | 36.8                |
| 9         |                                                | 81.4                |                                                | 80.9                |                                                | 81.2                |
| 10        | 3.03 (1H, d, 12.6)                             | 48.2                | 2.95 (1H, d, 9.2)                              | 48.0                | 3.08 (1H, d, 11.2)                             | 47.3                |
| 11        | 2.82 (1H, t, 7.7)                              | 41.2                | 2.49 (1H, dq, 8.3, 7.1)                        | 35.4                | 2.64 (1H, dq, 8.0, 7.2)                        | 35.3                |
| 12        | 1.96 (1H, m)<br>2.34 (1H, d, 14.7)             | 29.6                | 1.66 (1H, d, 14.1)<br>2.18 (1H, dd, 14.1, 8.3) | 36.3                | 1.61 (1H, d, 14.0)<br>2.11 (1H, dd, 14.0, 8.0) | 36.5                |
| 13        |                                                | 84.5                |                                                | 83.3                |                                                | 83.4                |
| 14        | 4.38 (1H, d, 2.9)                              | 81.4                | 4.28 (1H, d, 2.6)                              | 82.6                | 4.25 (1H, d, 2.5)                              | 82.6                |
| 15        |                                                | 145.4               |                                                | 146.8               |                                                | 146.8               |
| 16        | 4.94 (1H, t, 1.3)<br>5.17 (1H, s)              | 111.9               | 4.86 (1H, t, 1.5)<br>4.98 (1H, brs)            | 110.8               | 4.83 (1H, t, 1.4)<br>4.94 (1H, br s)           | 110.8               |
| 17        | 1.81 (3H, s)                                   | 19.0                | 1.75 (3H, s)                                   | 18.9                | 1.72 (3H, s)                                   | 18.9                |
| 18        | 4.35 (1H, t, 10.5)<br>5.07 (1H, dd, 10.3, 2.0) | 67.4                | 1.37 (3H, d, 7.1)                              | 21.4                | 1.43 (3H, d, 7.2)                              | 21.3                |
| 19        | 1.20 (3H, d, 6.9)                              | 14.6                | 1.01 (3H, d, 6.9)                              | 13.9                | 1.03 (3H, d, 6.6)                              | 14.5                |
| 20        | 3.84 (2H, d, 7.2)                              | 65.9                | 4.11 (1H, d, 11.7)<br>4.98 (1H, d, 11.7)       | 67.9                | 3.75 (1H, d, 12.2)<br>3.87 (1H, d, 12.2)       | 66.2                |
| 1'        |                                                | 118.5               |                                                | 119.8               |                                                | 119.7               |
| 2'        | 3.92 (1H, d, 7.5)                              | 70.7                | 1.81, 1.97 (1H, m)                             | 33.4                | 1.83, 1.99 (1H, m)                             | 33.6                |
| 3'        | 1.48, 1.61 (1H, m)                             | 28.6                | 1.60, 1.69 (1H, m)                             | 21.0                | 1.62, 1.73 (1H, m)                             | 21.0                |
| 4'        | 1.32, 1.67 (1H, m)                             | 24.5                | 1.27, 1.33 (1H, m)                             | 27.7                | 1.28, 1.38 (1H, m)                             | 27.8                |
| 5'        | 1.45, 1.57 (1H, m)                             | 19.3                | 1.27, 1.33 (1H, m)                             | 27.8                | 1.28, 1.38 (1H, m)                             | 28.0                |
| 6'        | 1.70, 1.88 (1H, m)                             | 28.7                | 1.24, 1.39 (1H, m)                             | 26.6                | 1.27, 1.45 (1H, m)                             | 26.7                |
| 7'        | 5.36 (1H, dt, 11.2, 5.0)                       | 73.4                | 1.15, 1.55 (1H, m)                             | 24.8                | 1.17, 1.60 (1H, m)                             | 24.7                |
| 8'        | 1.55, 2.00 (1H, m)                             | 27.6                | 1.31 (2H, m)                                   | 37.6                | 1.39 (2H, m)                                   | 38.0                |
| 9'        | 2.39 (1H, m)                                   | 28.1                | 2.37 (1H, m)                                   | 29.4                | 2.54 (1H, m)                                   | 29.2                |
| 10'       | 1.26 (3H, d, 7.4)                              | 18.7                | 0.79 (3H, d, 6.5)                              | 13.0                | 0.82 (3H, d, 6.9)                              | 12.6                |
| 3-Bz-CO   |                                                | 168.2               |                                                |                     |                                                | 167.8               |
| 3-Bz-1    |                                                | 130.8               |                                                |                     |                                                | 129.9               |
| 3-Bz-2,6  | 8.16 (2H, dd, 8.6, 1.5)                        | 130.1               |                                                |                     | 8.02 (2H, dd, 8.0, 1.1)                        | 129.7               |
| 3-Bz-3,5  | 7.35 (2H, t, 7.5)                              | 128.5               |                                                |                     | 7.47 (2H, t, 8.0)                              | 128.7               |
| 3-Bz-4    | 7.53 (1H, tt, 7.5, 1.3)                        | 133.5               |                                                |                     | 7.59 (1H, tt, 8.0, 1.1)                        | 133.5               |
| 18-Bz-CO  |                                                | 166.0               |                                                |                     |                                                |                     |
| 18-Bz-1   |                                                | 129.3               |                                                |                     |                                                |                     |
| 18-Bz-2,6 | 8.05 (2H, dd, 8.5, 1.4)                        | 129.6               |                                                |                     |                                                |                     |
| 18-Bz-3,5 | 7.44 (2H, t, 7.5)                              | 128.4               |                                                |                     |                                                |                     |
| 18-Bz-4   | 7.54 (1H, tt, 7.5, 1.3)                        | 132.8               |                                                |                     |                                                |                     |

|                        |                         |       |
|------------------------|-------------------------|-------|
| 20-Bz-CO               |                         | 166.7 |
| 20-Bz-1                |                         | 129.9 |
| 20-Bz-2,6              | 8.06 (1H, dd, 8.0, 1.4) | 129.9 |
| 20-Bz-3,5              | 7.44 (1H, t, 8.0)       | 128.5 |
| 20-Bz-4                | 7.55 (1H, tt, 8.0, 1.4) | 133.2 |
| 7 <sup>1</sup> -Bz-CO  |                         | 166.5 |
| 7 <sup>1</sup> -Bz-1   |                         | 129.3 |
| 7 <sup>1</sup> -Bz 2,6 | 8.11 (2H, dd, 8.3, 1.1) | 129.6 |
| 7 <sup>1</sup> -Bz 3,5 | 7.47 (2H, t, 7.5)       | 128.3 |
| 7 <sup>1</sup> -Bz-4   | 7.58 (1H, tt, 7.5, 1.3) | 133.0 |

<sup>a</sup>Overlapping resonances.

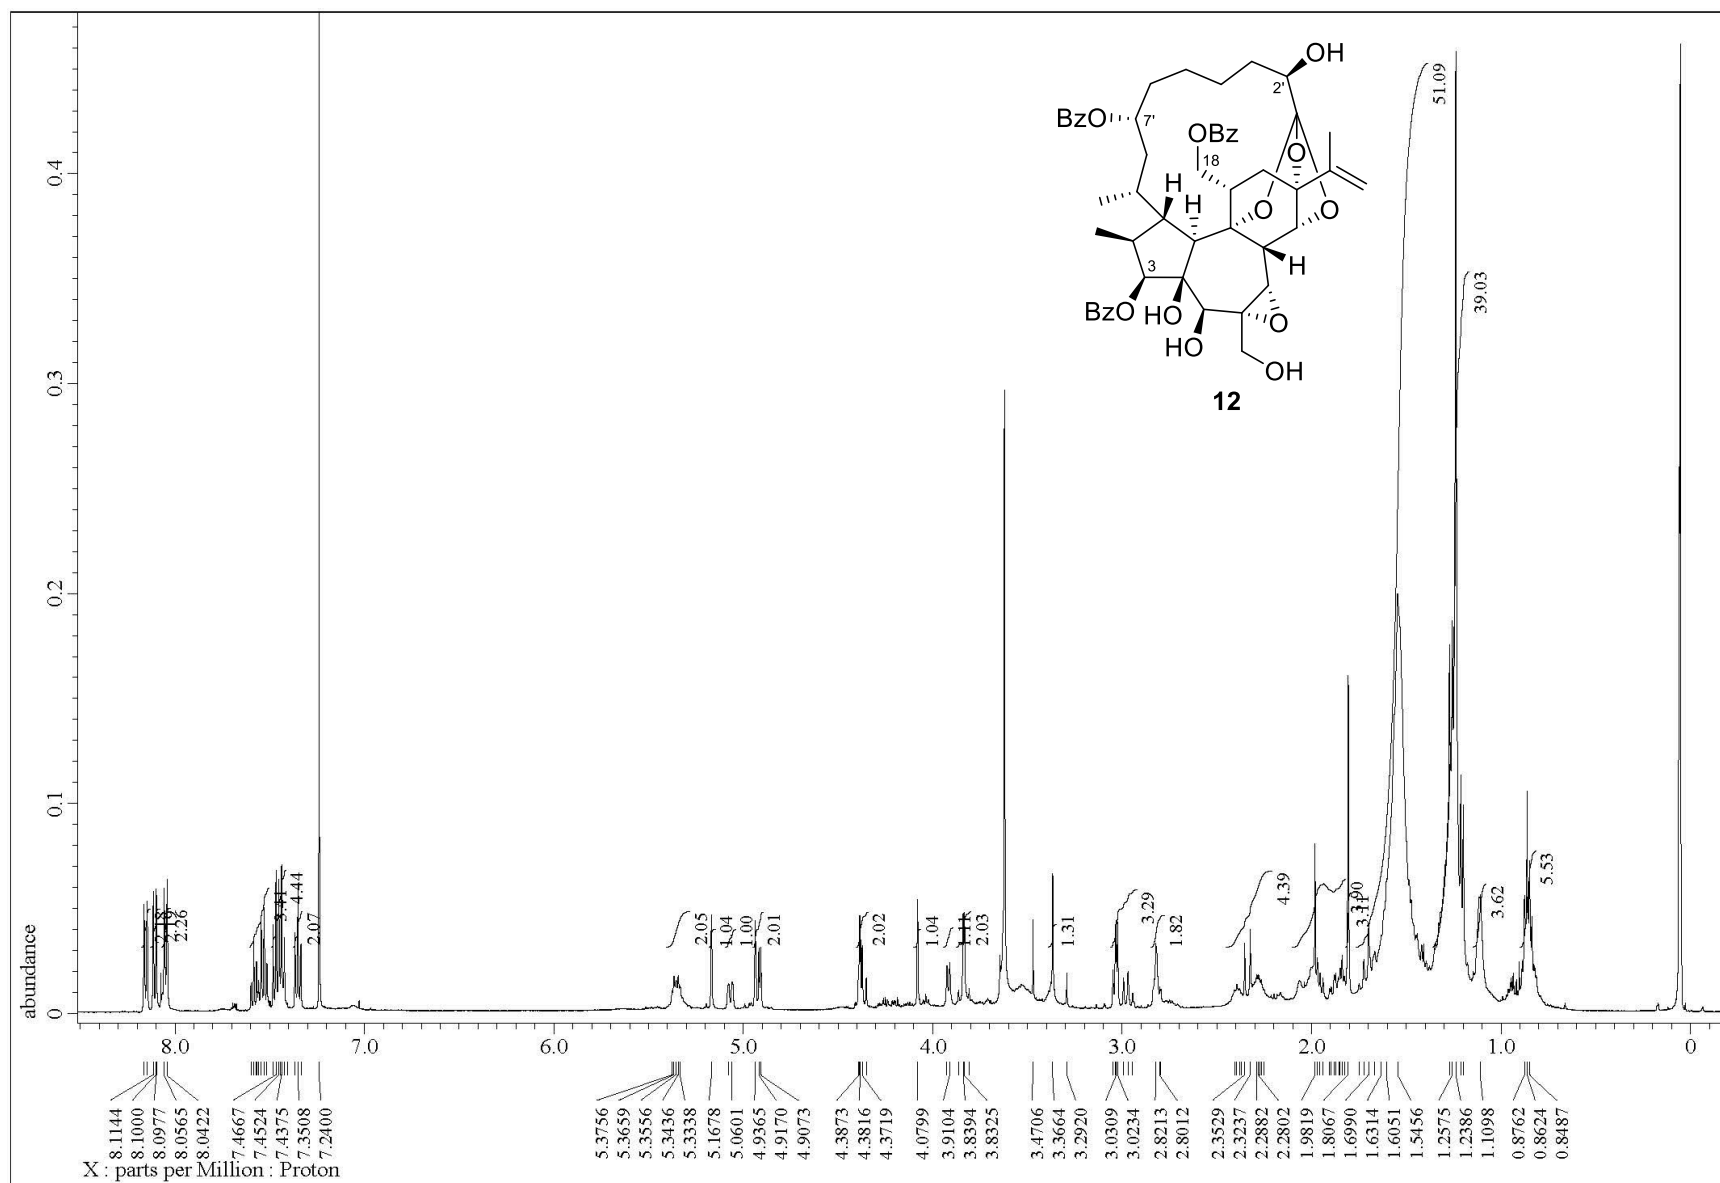

**Figure S2.**  $^1\text{H}$ -NMR spectrum of compound 12.



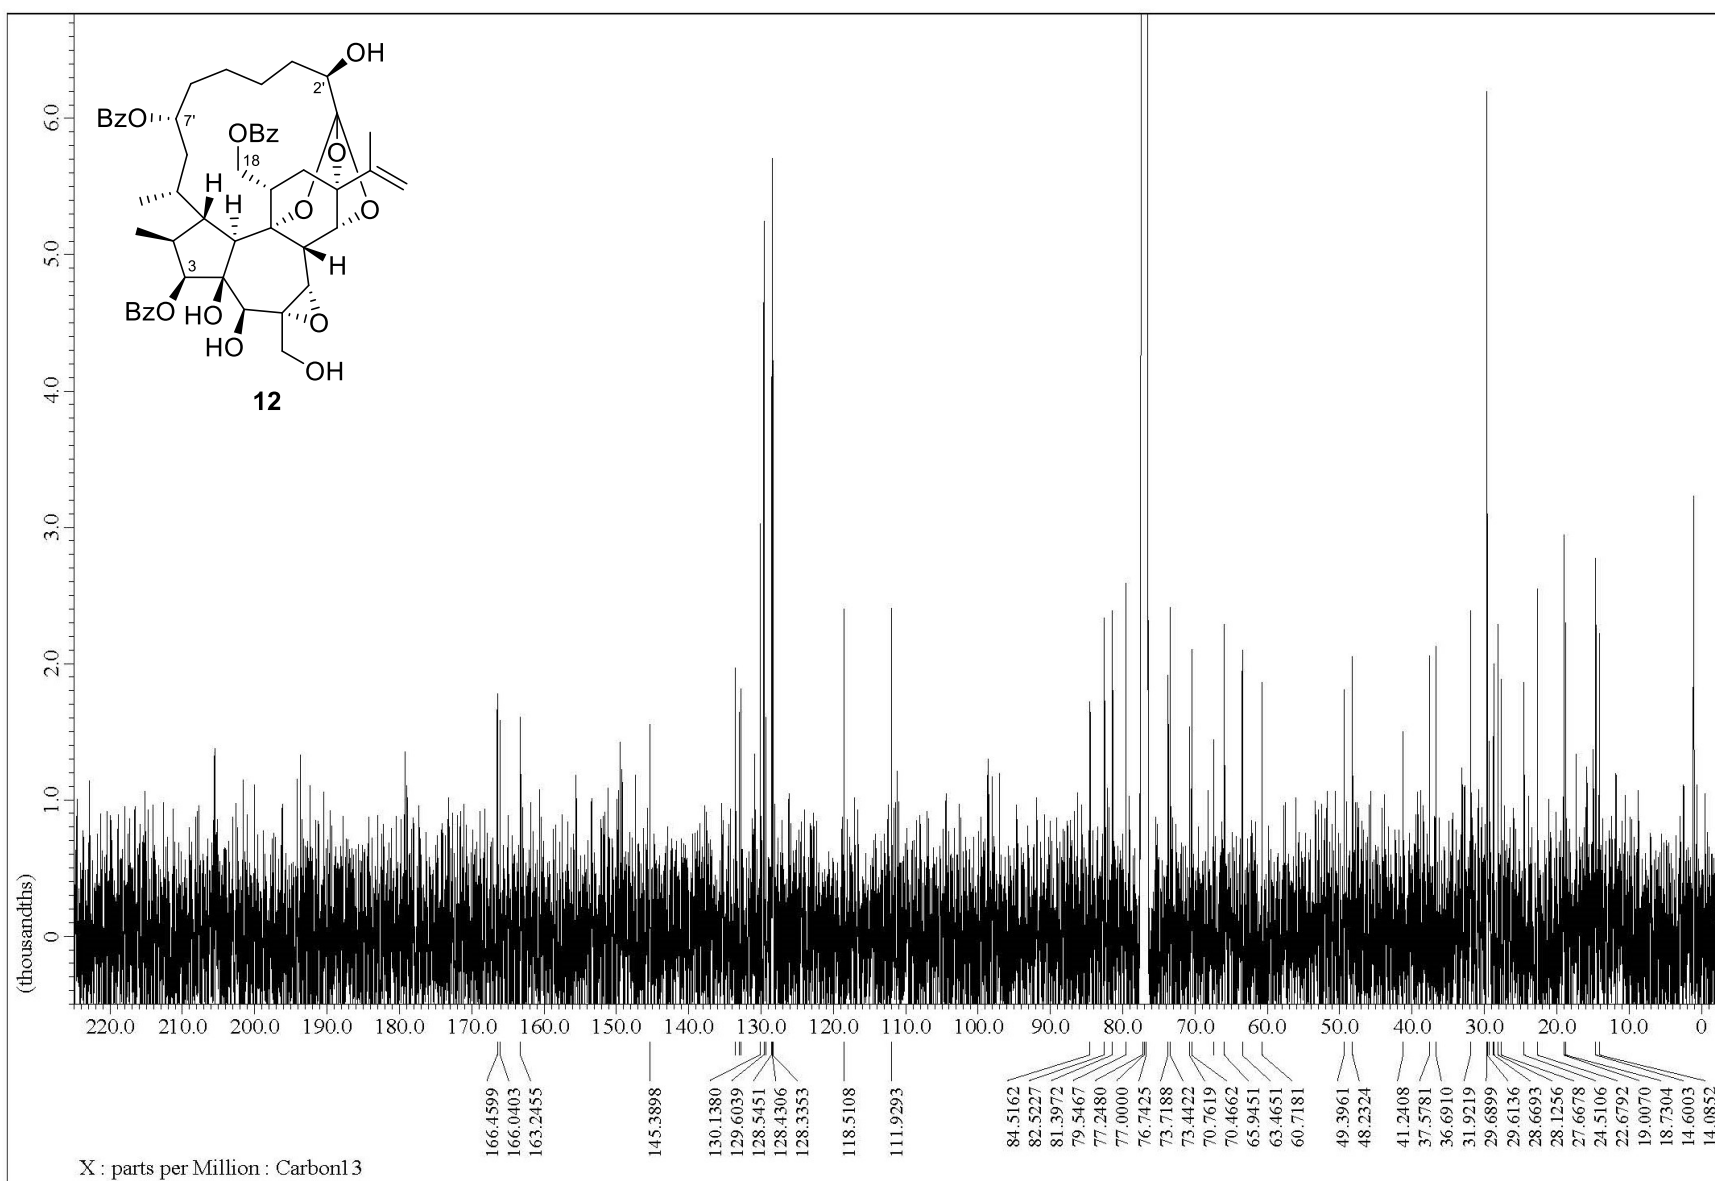

**Figure S3.**  $^{13}\text{C}$ -NMR spectrum of compound 12.

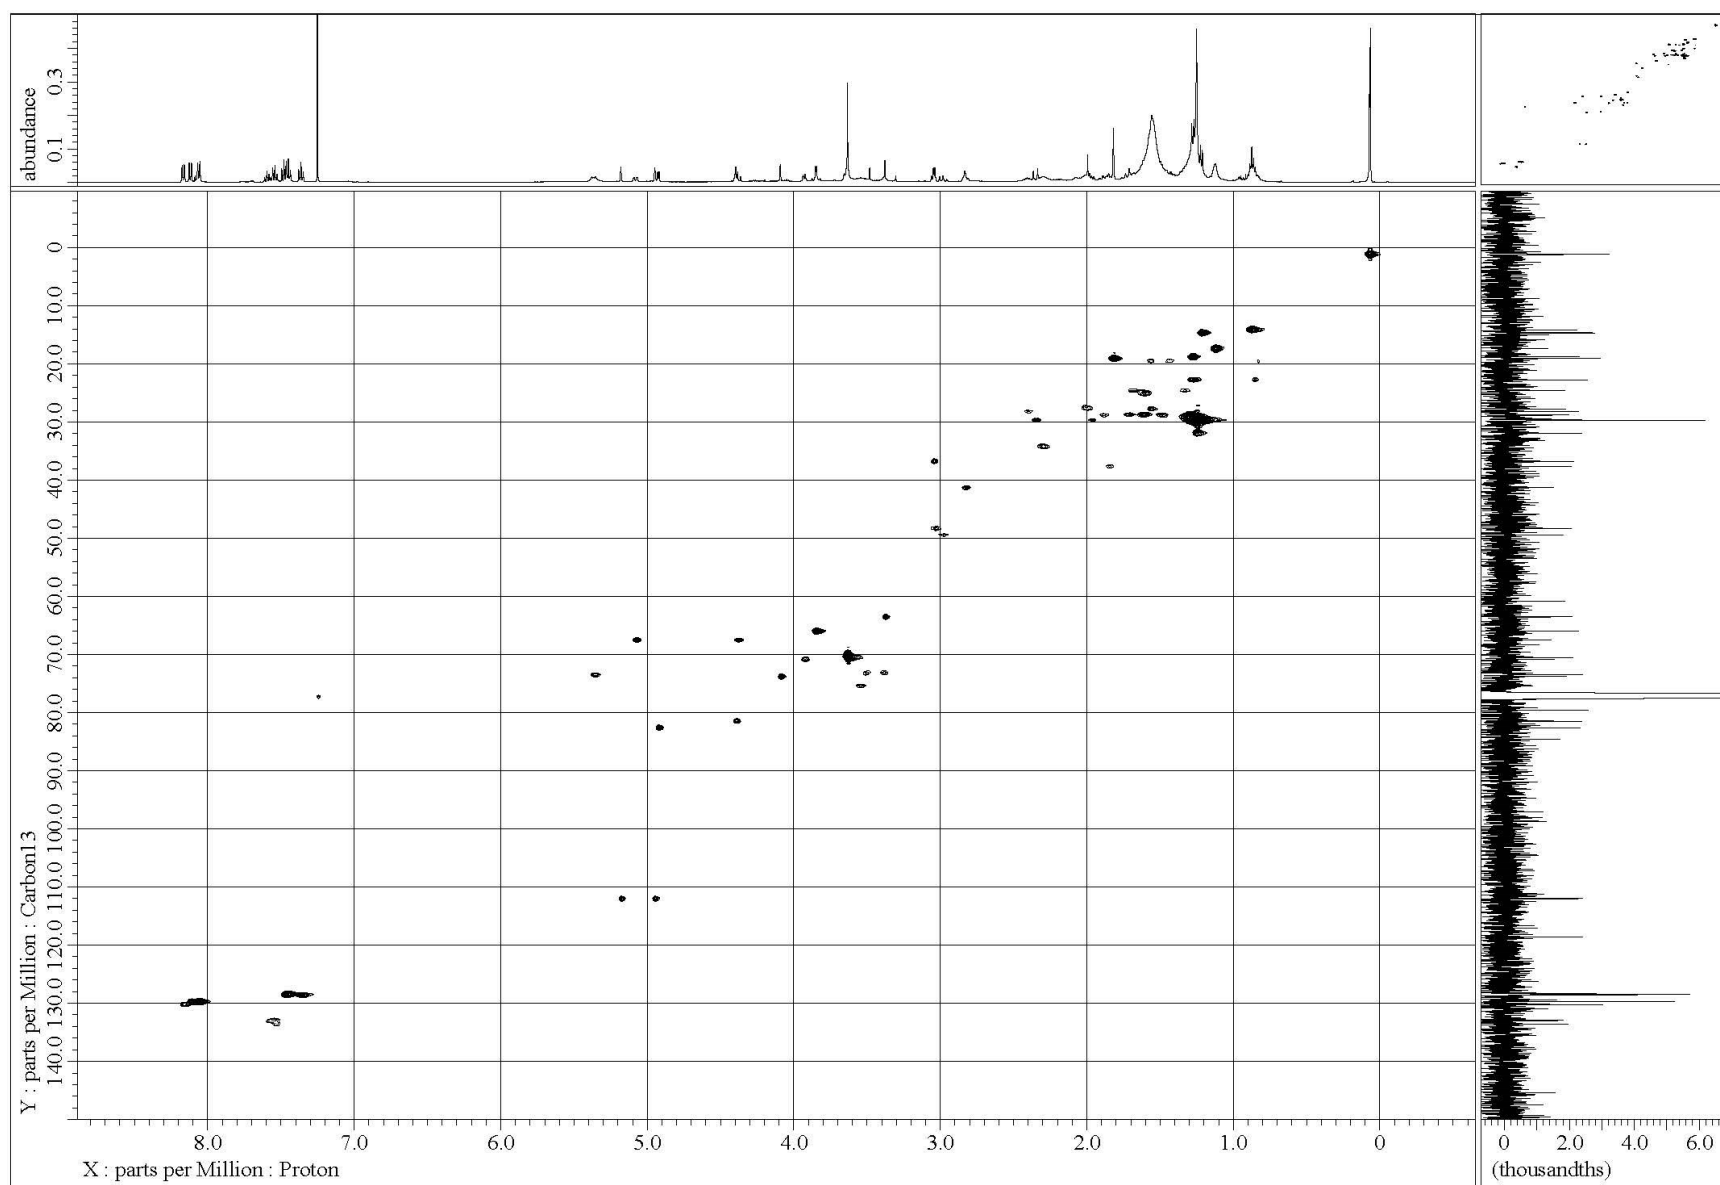

**Figure S4.** HSQC spectrum of compound **12**.

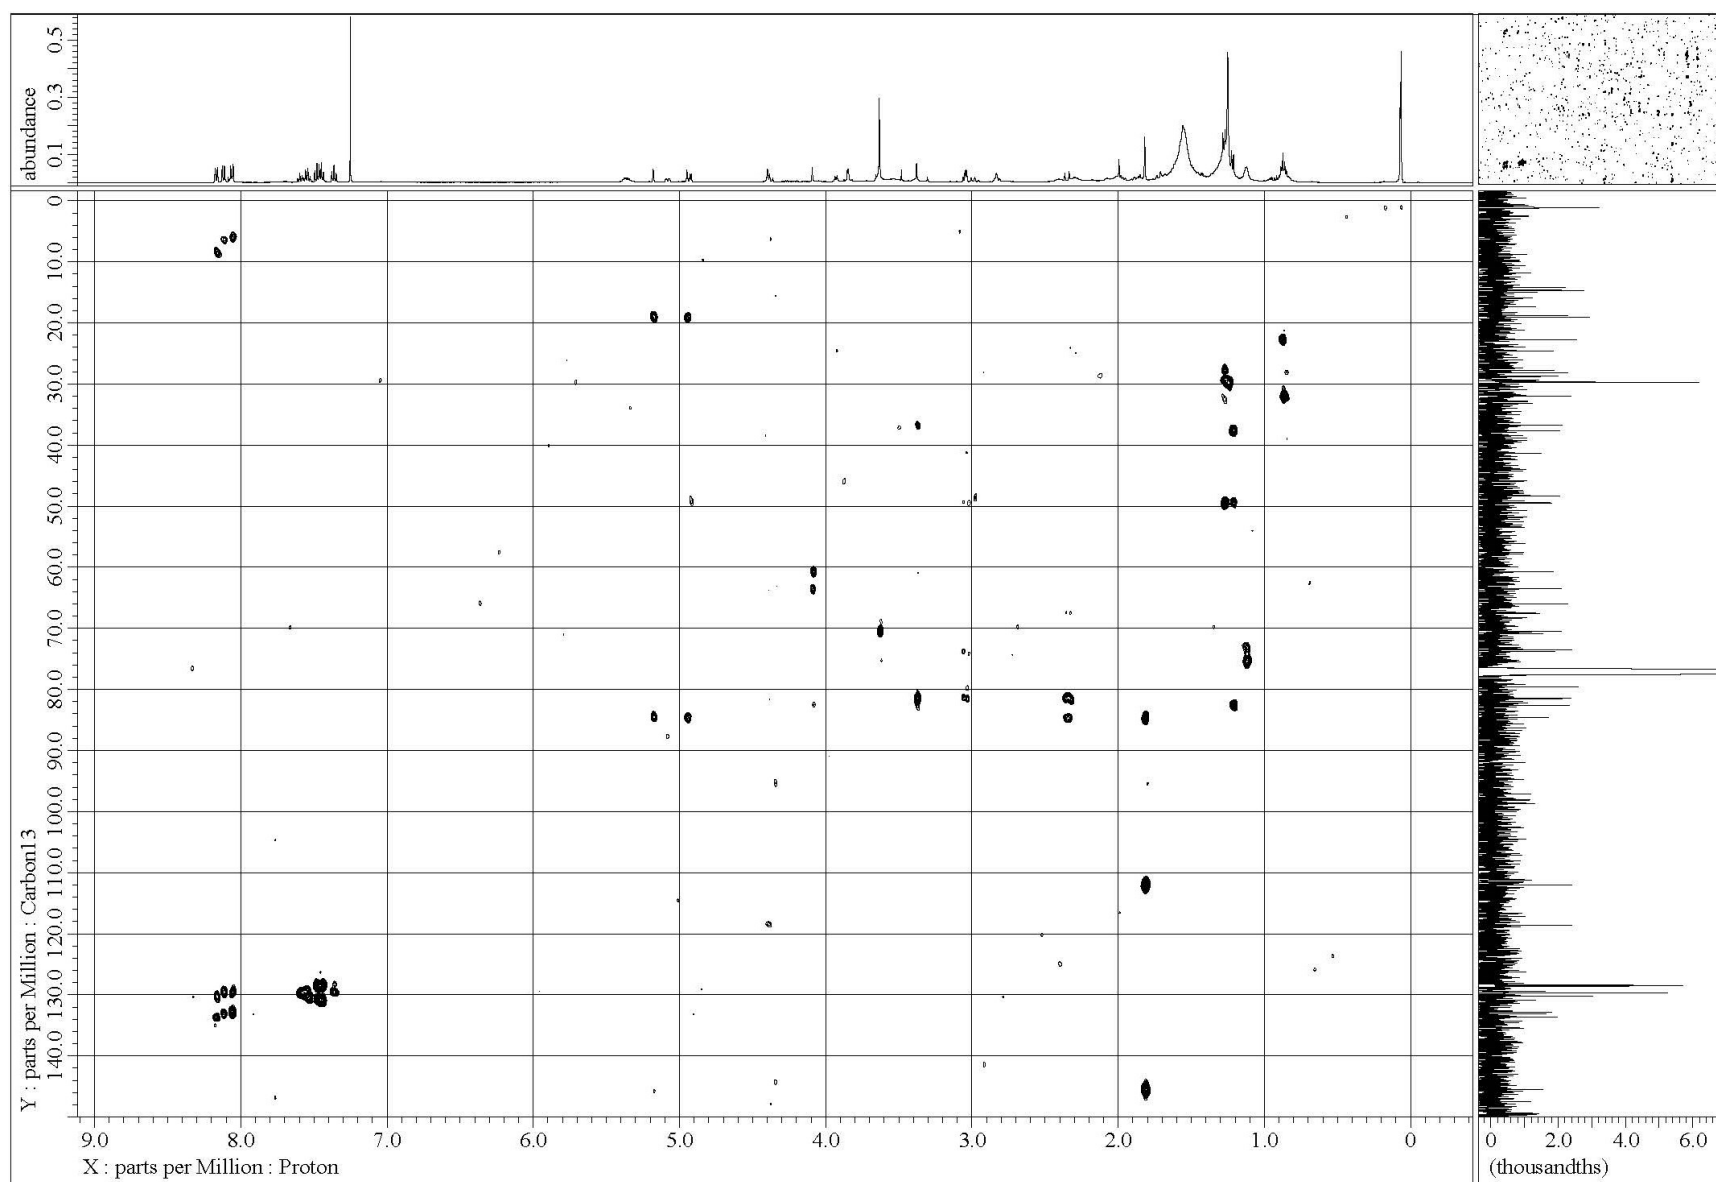

**Figure S5.** HMBC spectrum of compound **12**.

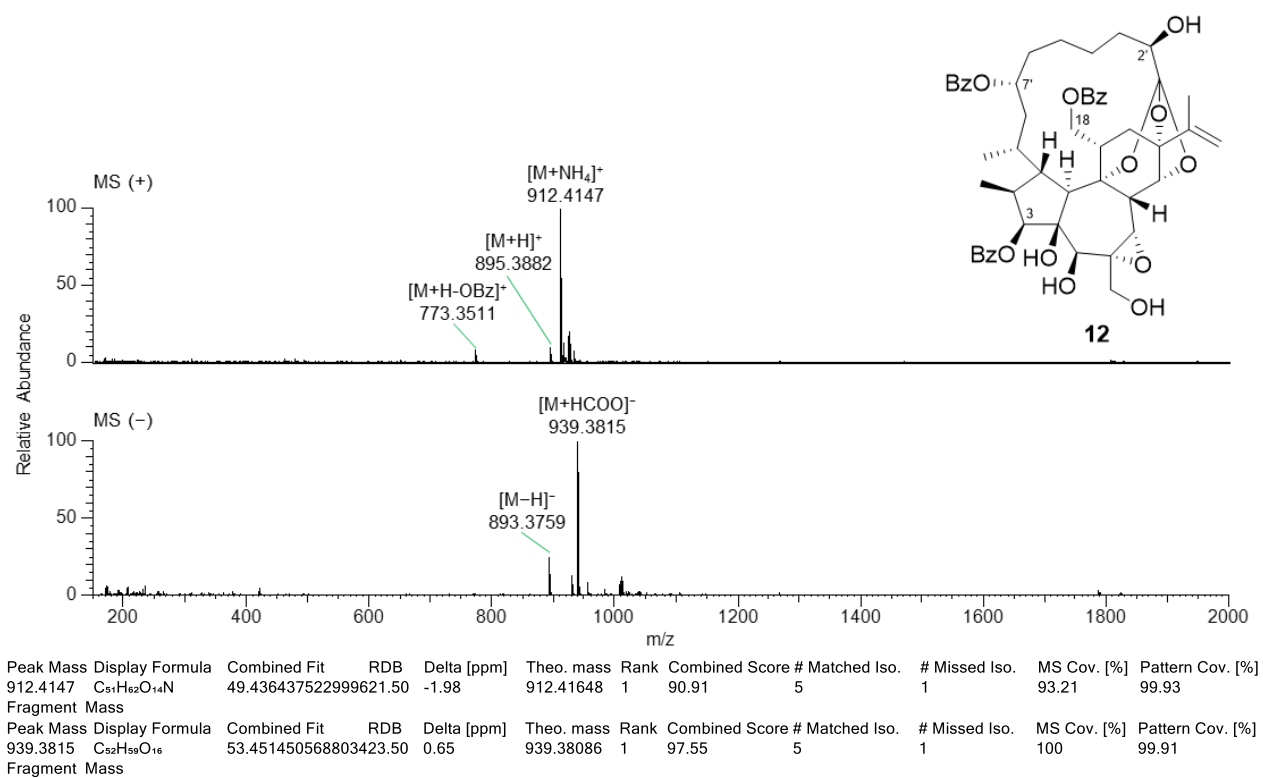

**Figure S6.** HRESIMS data of isolated compound **12** in positive ion mode (upper) and negative ion mode (lower).

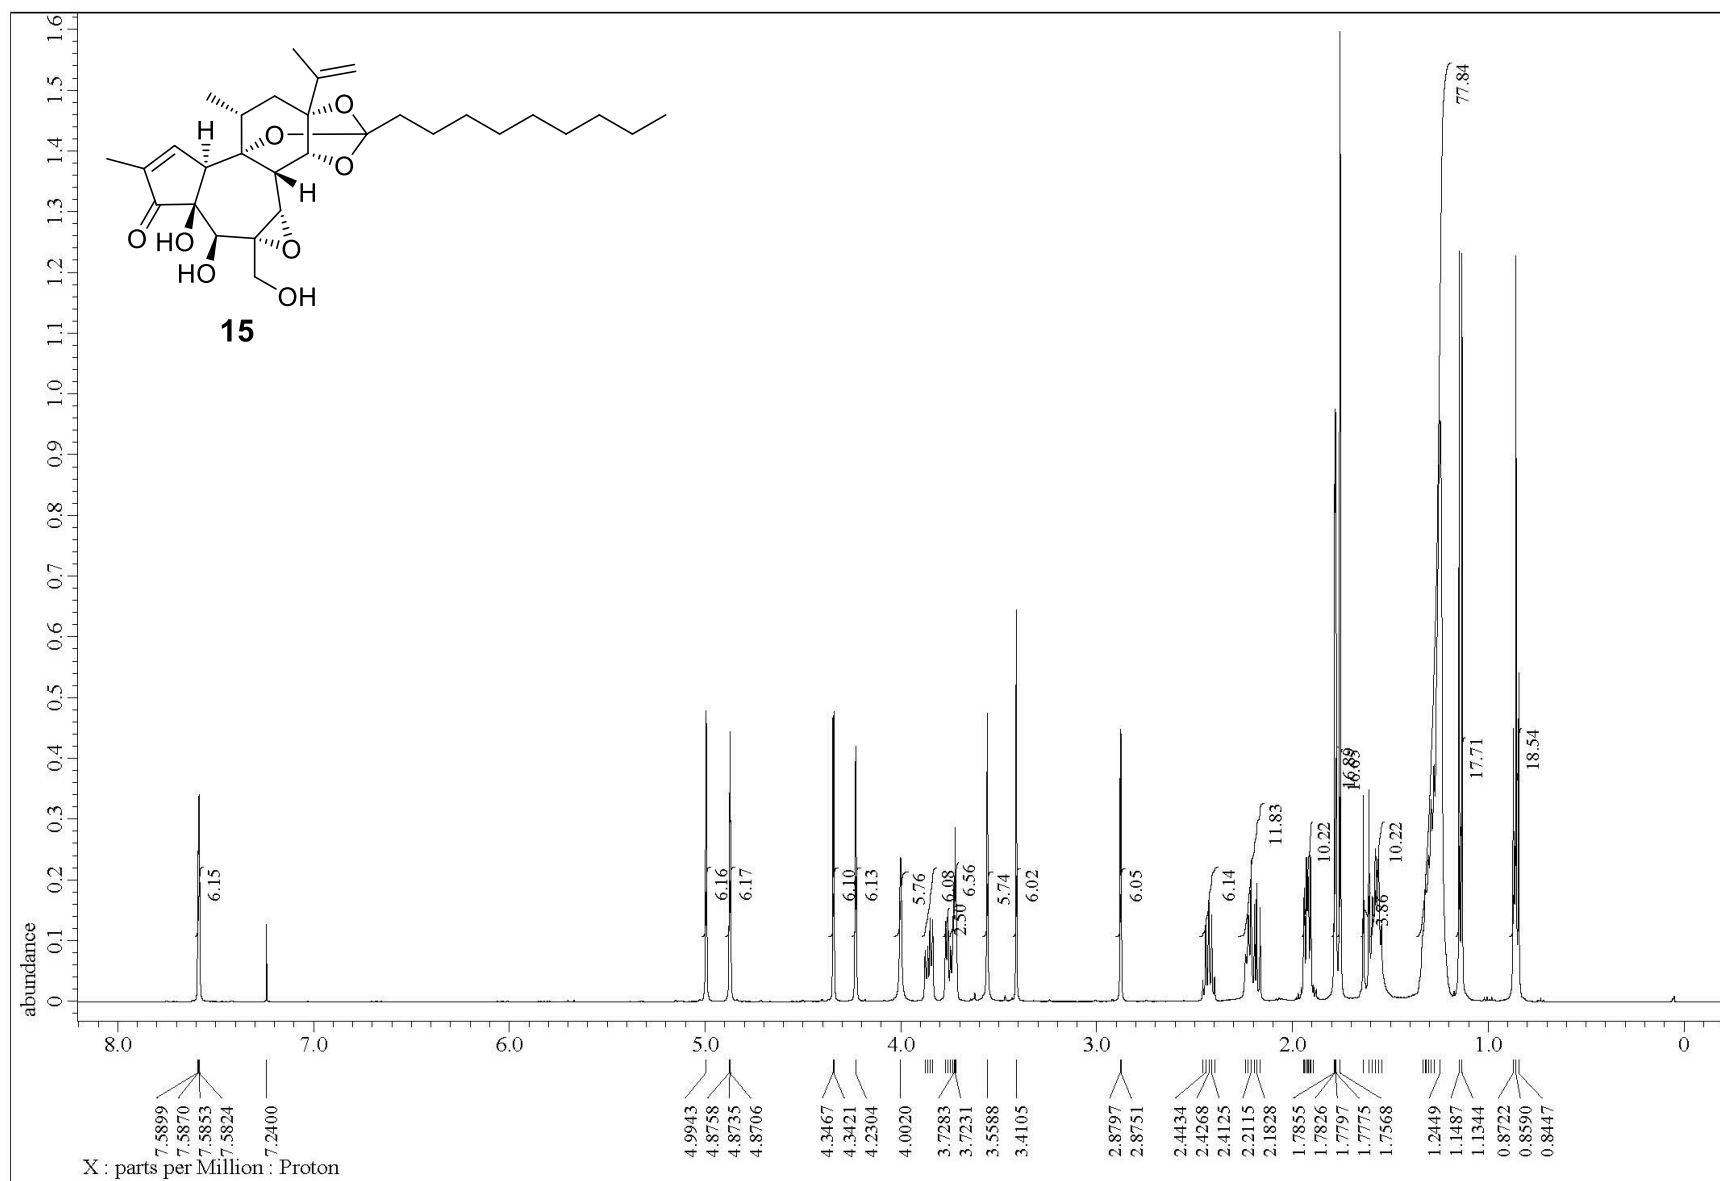

**Figure S7.**  $^1\text{H}$ -NMR spectrum of compound **15**.

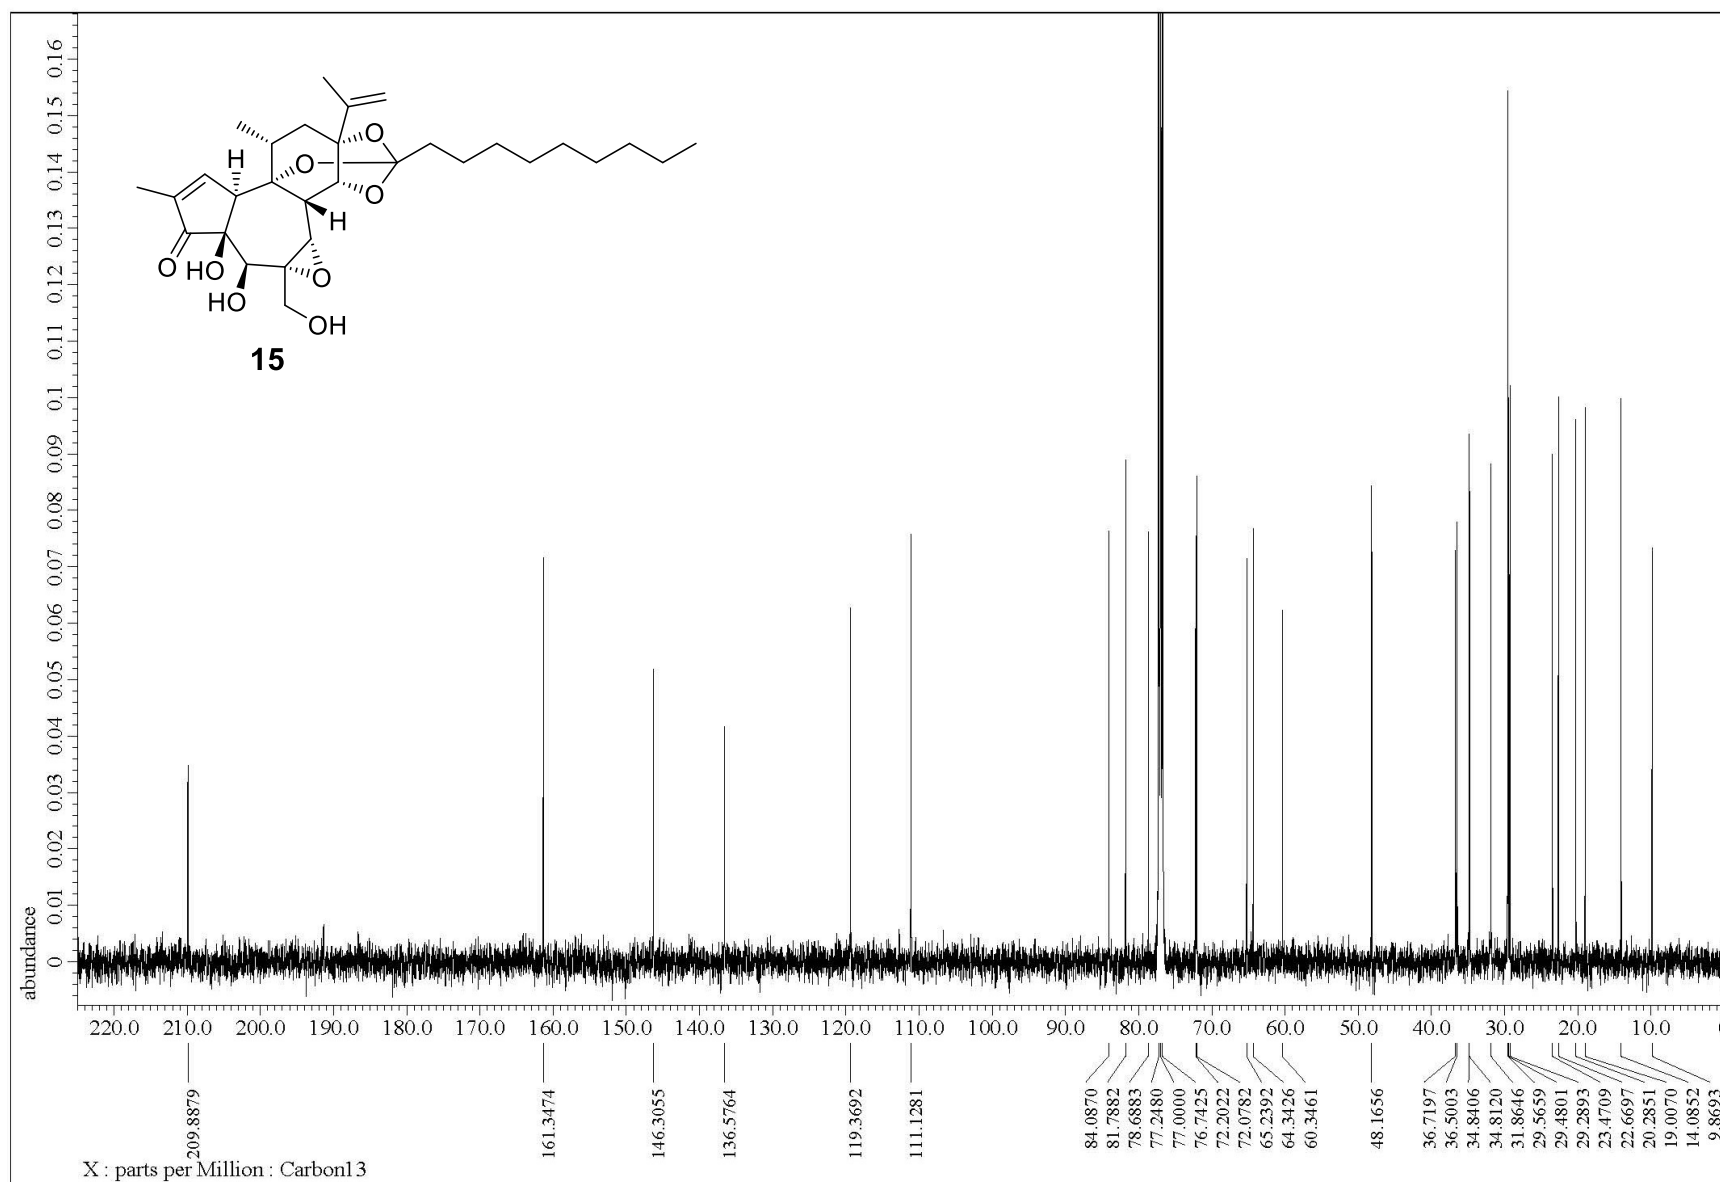

Figure S8.  $^{13}\text{C}$ -NMR spectrum of compound 15.

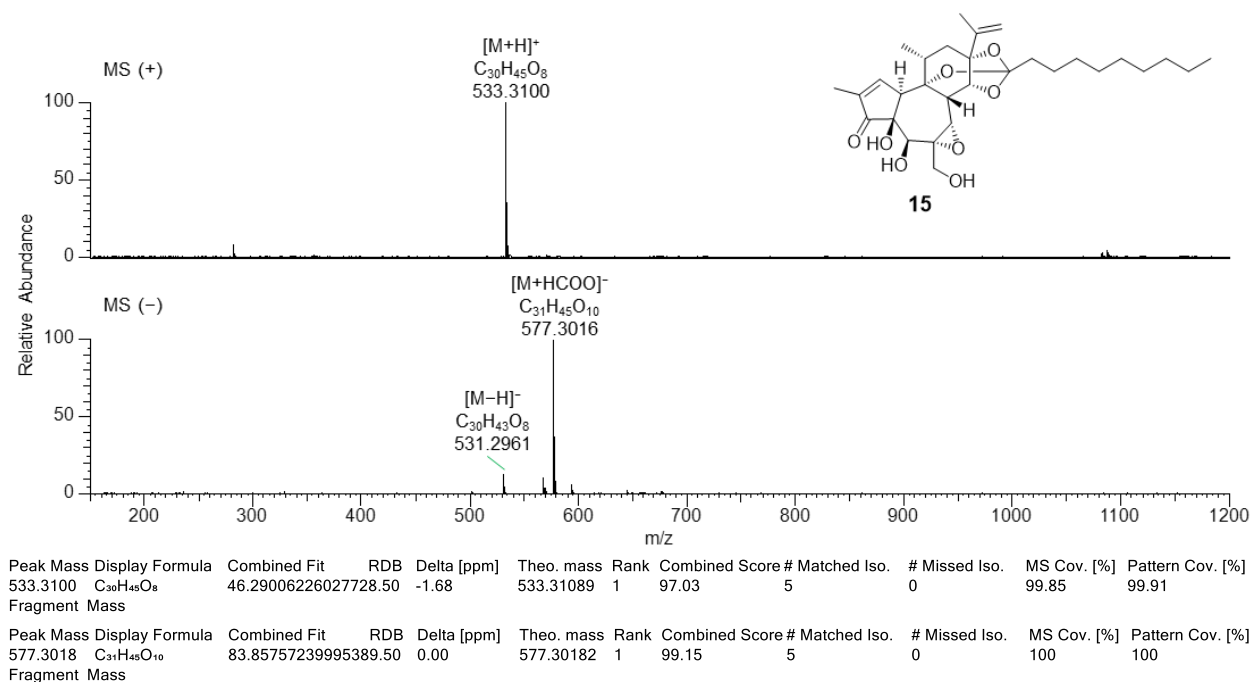

**Figure S9.** HRESIMS data of isolated compound **15** in positive ion mode (upper) and negative ion mode (lower).

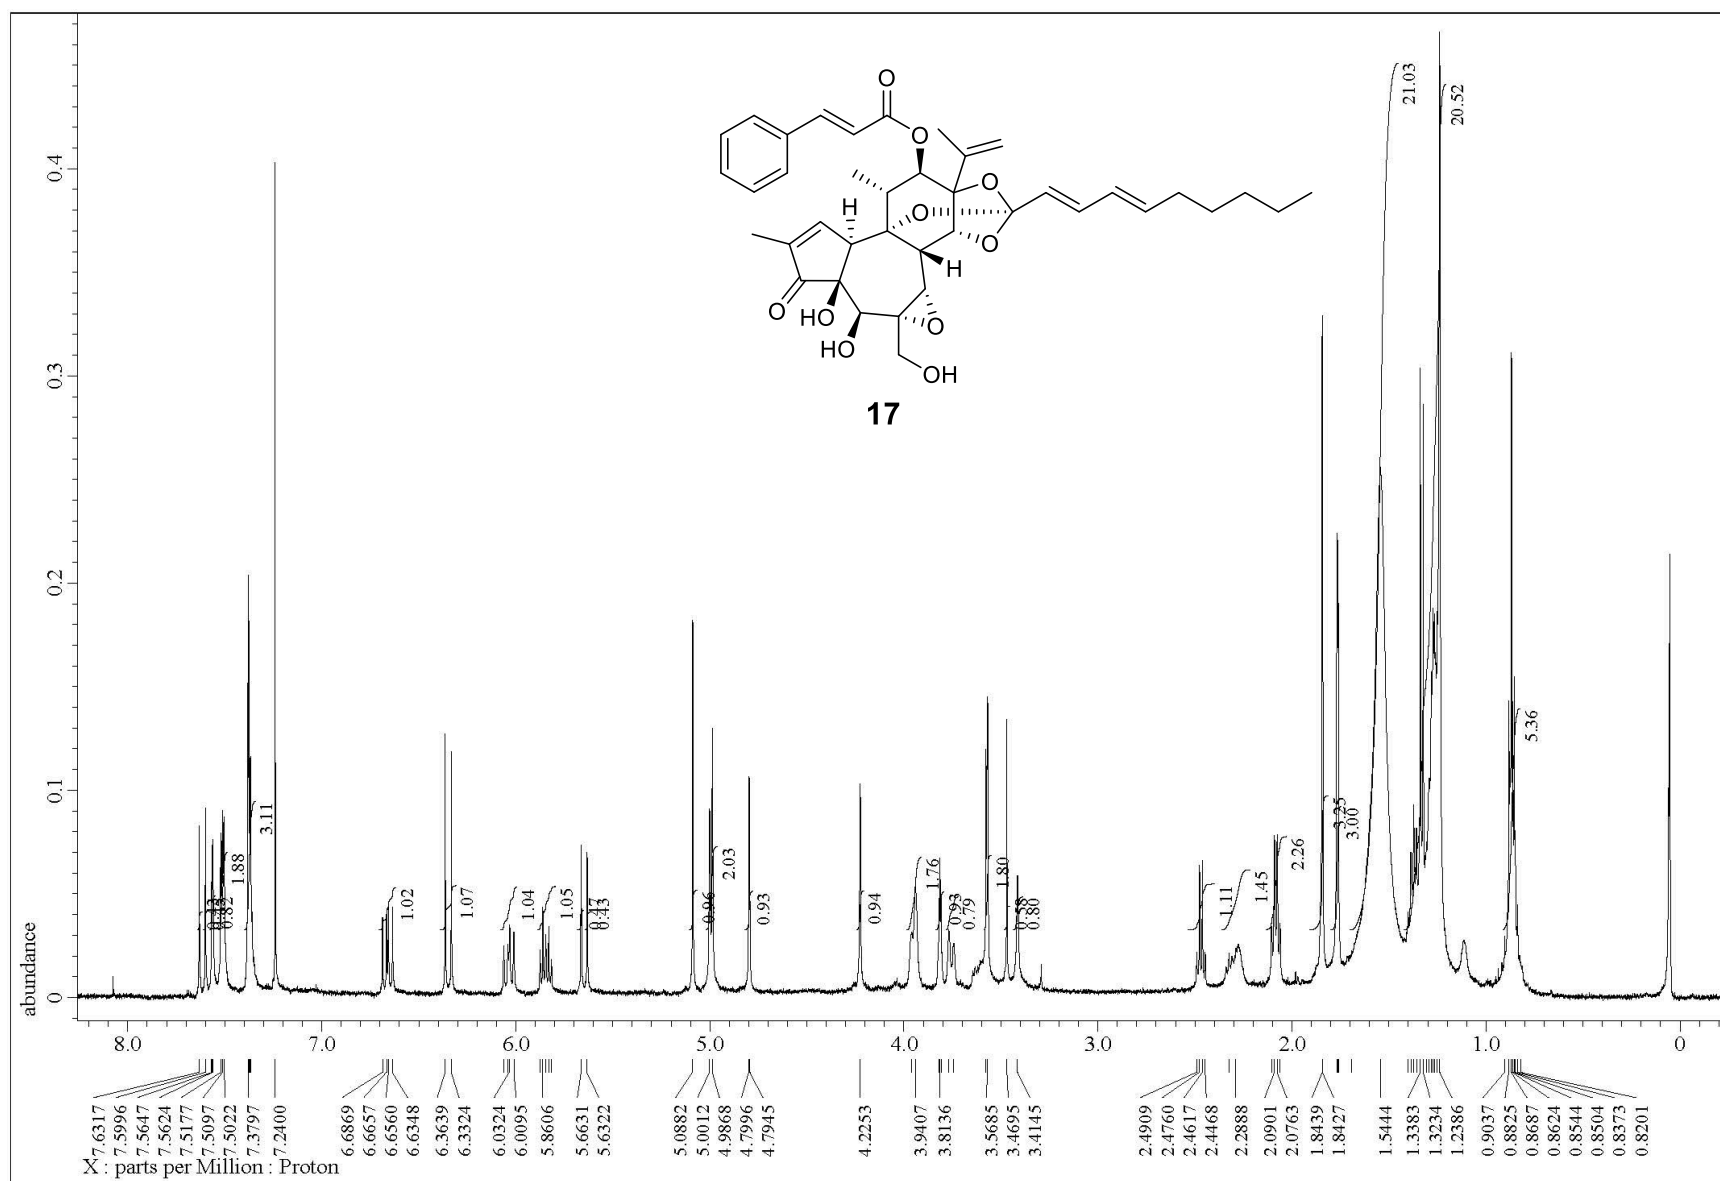

Figure S10. <sup>1</sup>H-NMR spectrum of compound 17.



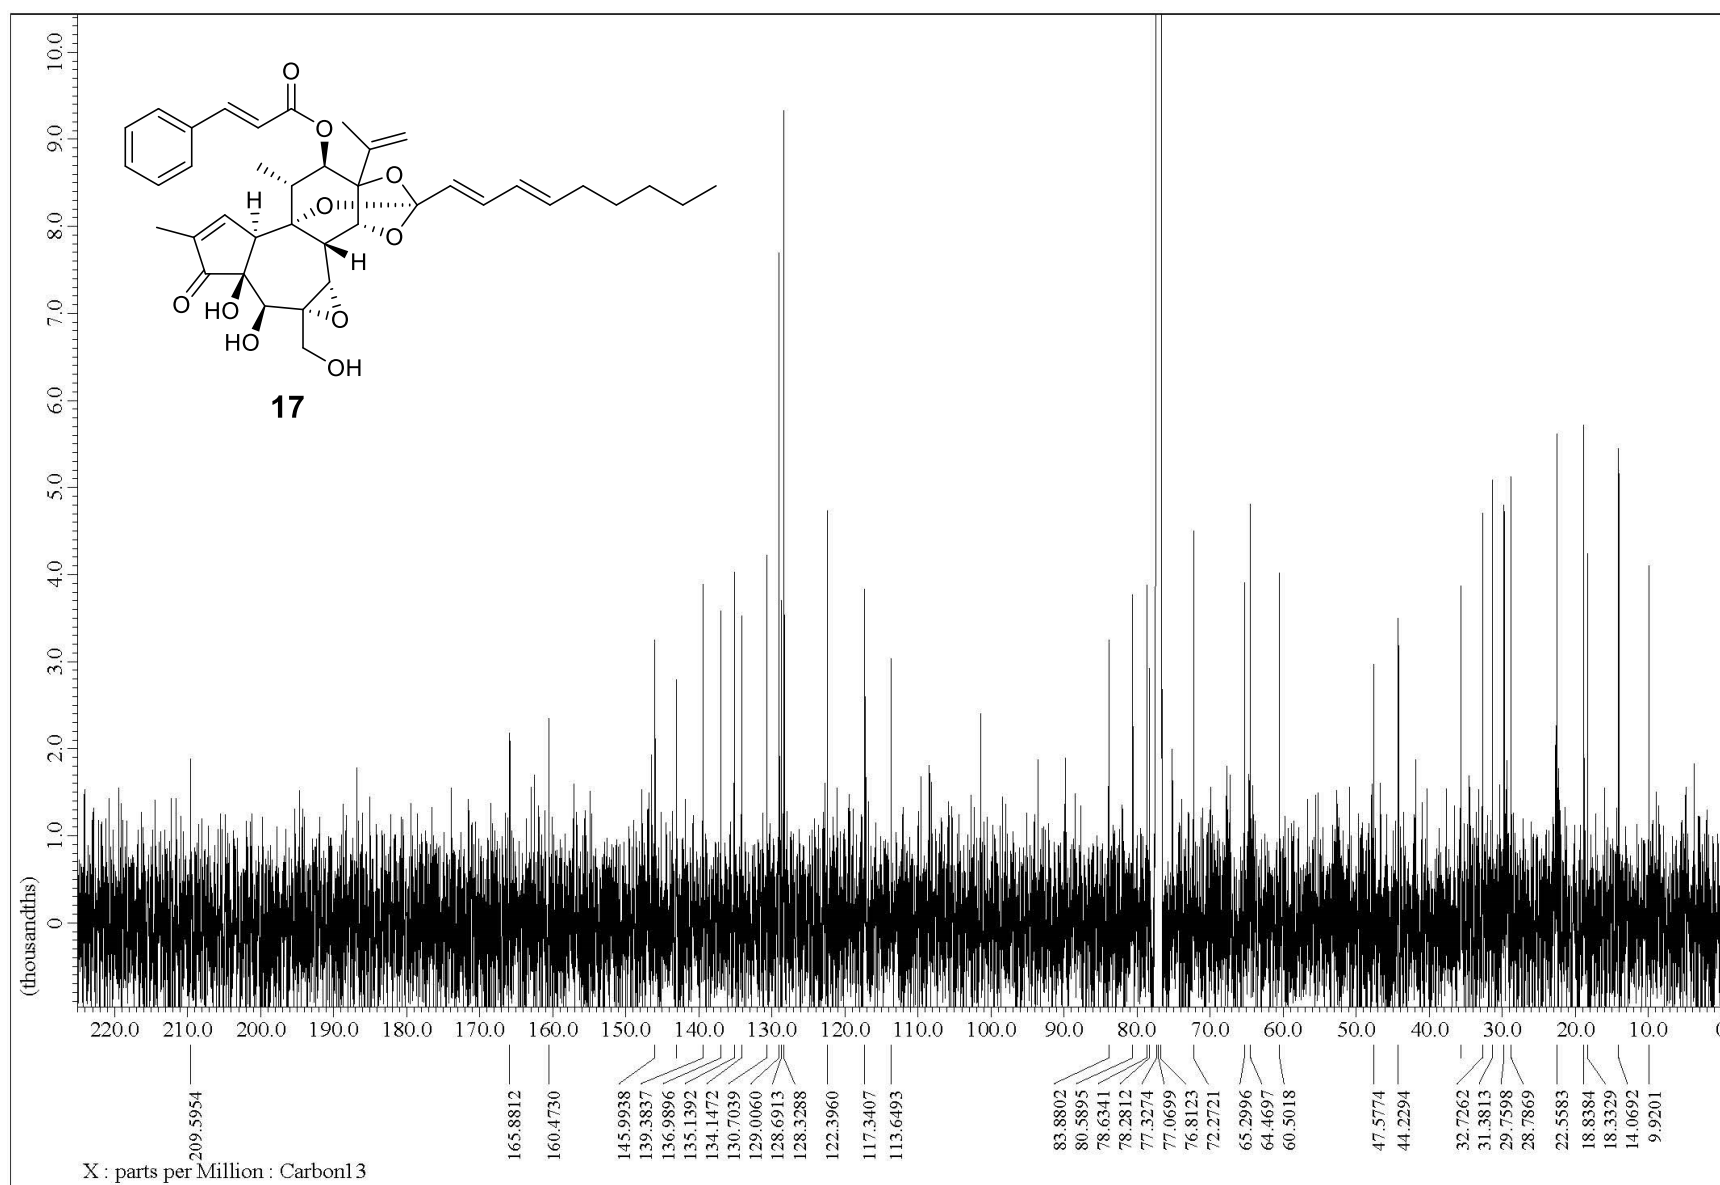

Figure S11.  $^{13}\text{C}$ -NMR spectrum of compound 17.

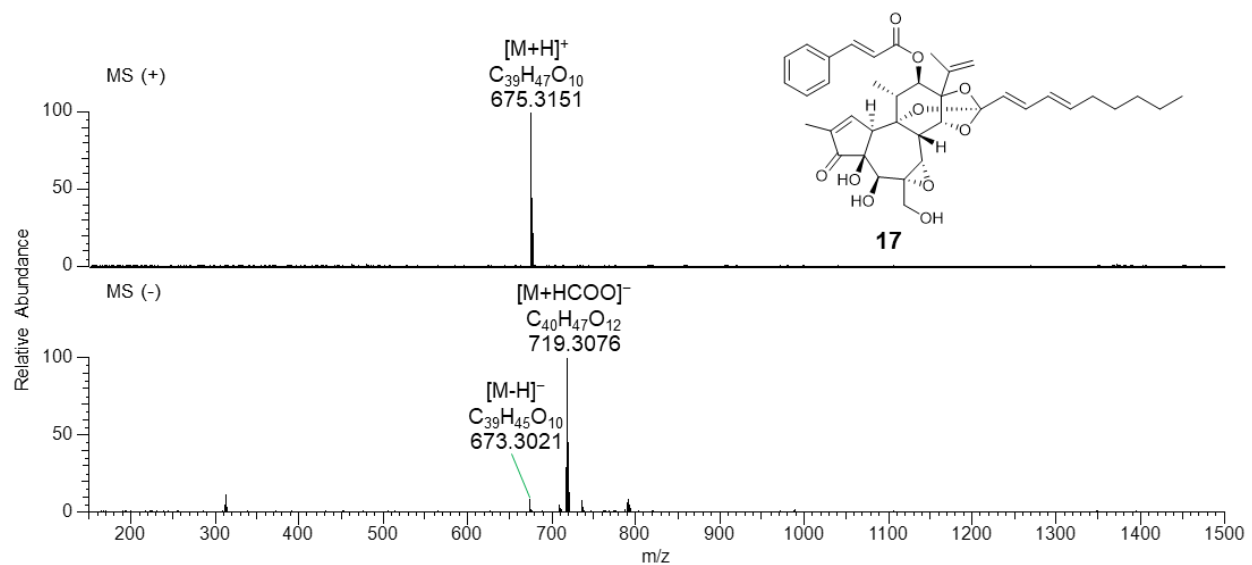

| Peak Mass     | Display Formula                                 | Combined Fit     | RDB   | Delta [ppm] | Theo. mass | Rank | Combined Score | # Matched Iso. | # Missed Iso. | MS Cov. [%] | Pattern Cov. [%] |
|---------------|-------------------------------------------------|------------------|-------|-------------|------------|------|----------------|----------------|---------------|-------------|------------------|
| 675.3151      | C <sub>39</sub> H <sub>47</sub> O <sub>10</sub> | 65.9961893811134 | 16.50 | -1.85       | 675.31637  | 1    | 98.21          | 5              | 0             | 100         | 100              |
| Fragment Mass |                                                 |                  |       |             |            |      |                |                |               |             |                  |
| Peak Mass     | Display Formula                                 | Combined Fit     | RDB   | Delta [ppm] | Theo. mass | Rank | Combined Score | # Matched Iso. | # Missed Iso. | MS Cov. [%] | Pattern Cov. [%] |
| 719.3076      | C <sub>40</sub> H <sub>47</sub> O <sub>12</sub> | 61.3987308490693 | 17.50 | 1.97        | 719.30620  | 1    | 97.88          | 5              | 0             | 99.9        | 100              |
| Fragment Mass |                                                 |                  |       |             |            |      |                |                |               |             |                  |

**Figure S12.** HRESIMS data of isolated compound **17** in positive ion mode (upper) and negative ion mode (lower).



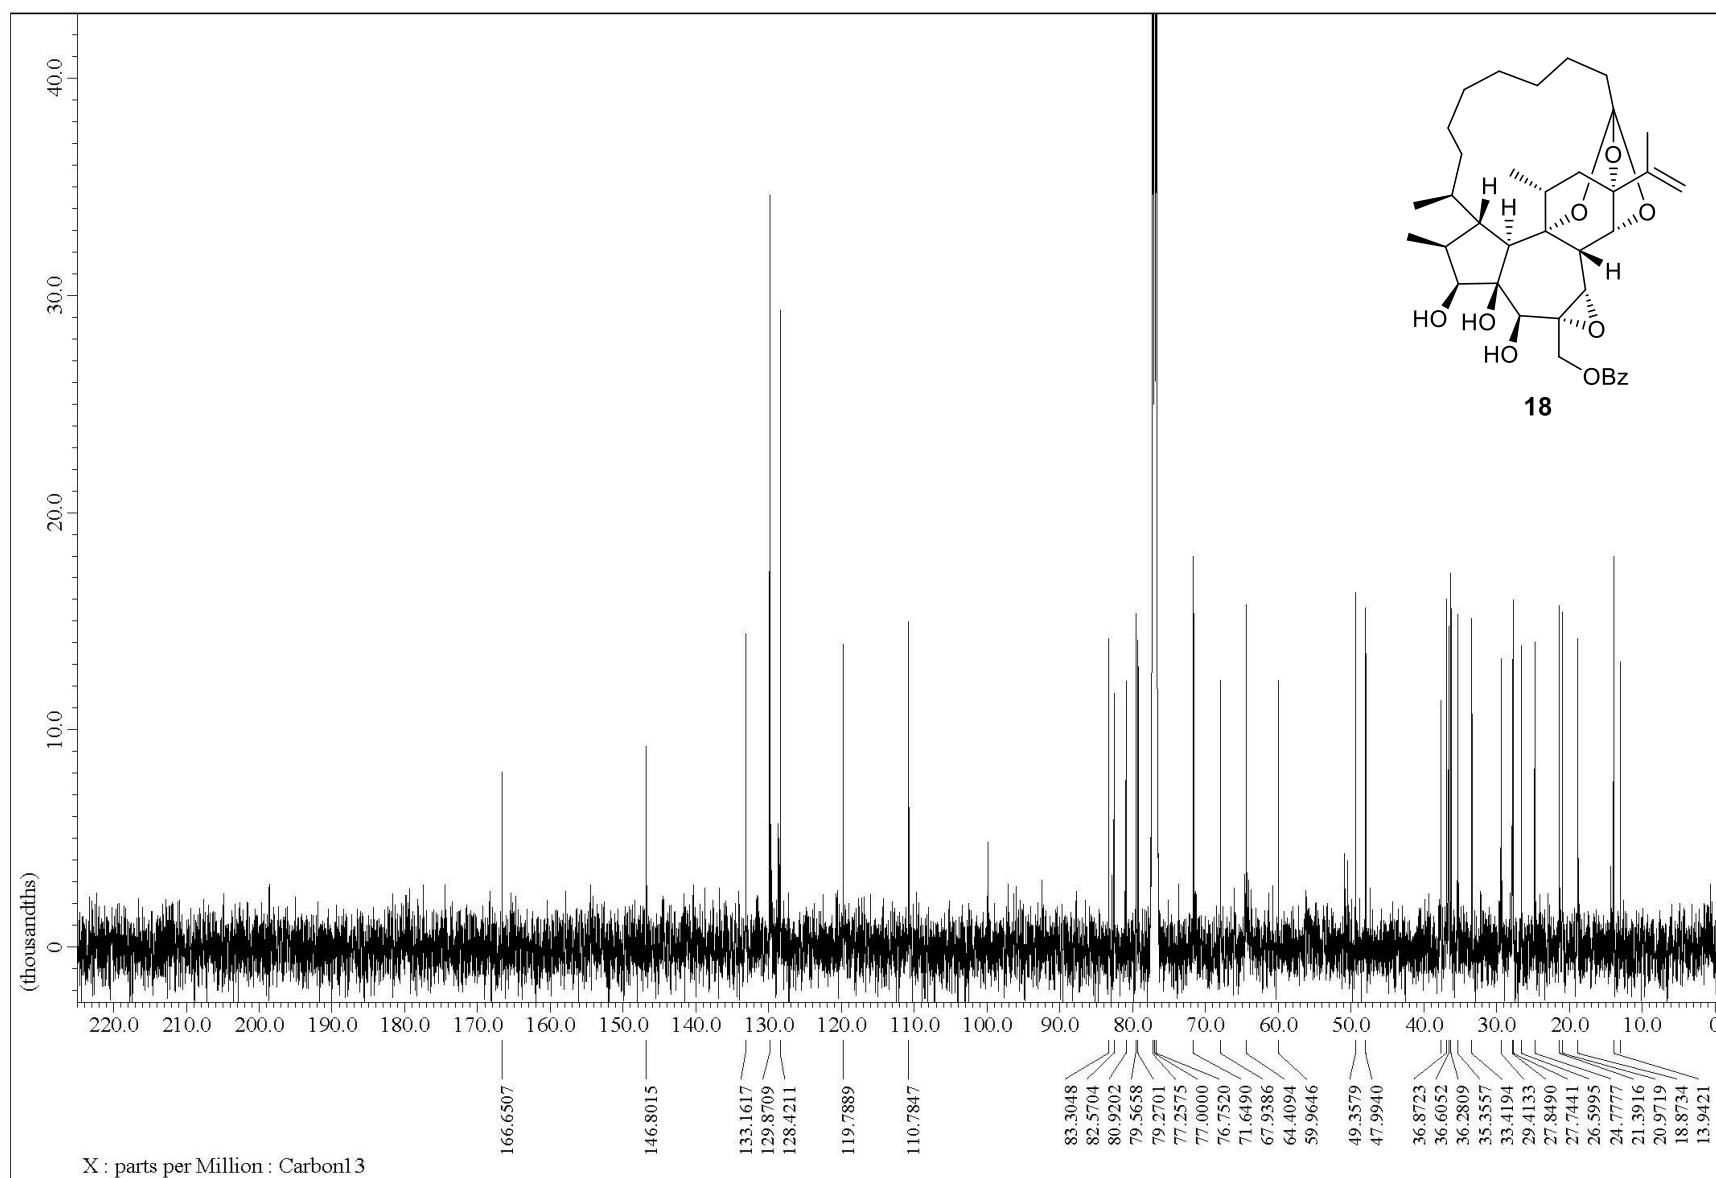

Figure S14.  $^{13}\text{C}$ -NMR spectrum of compound 18.

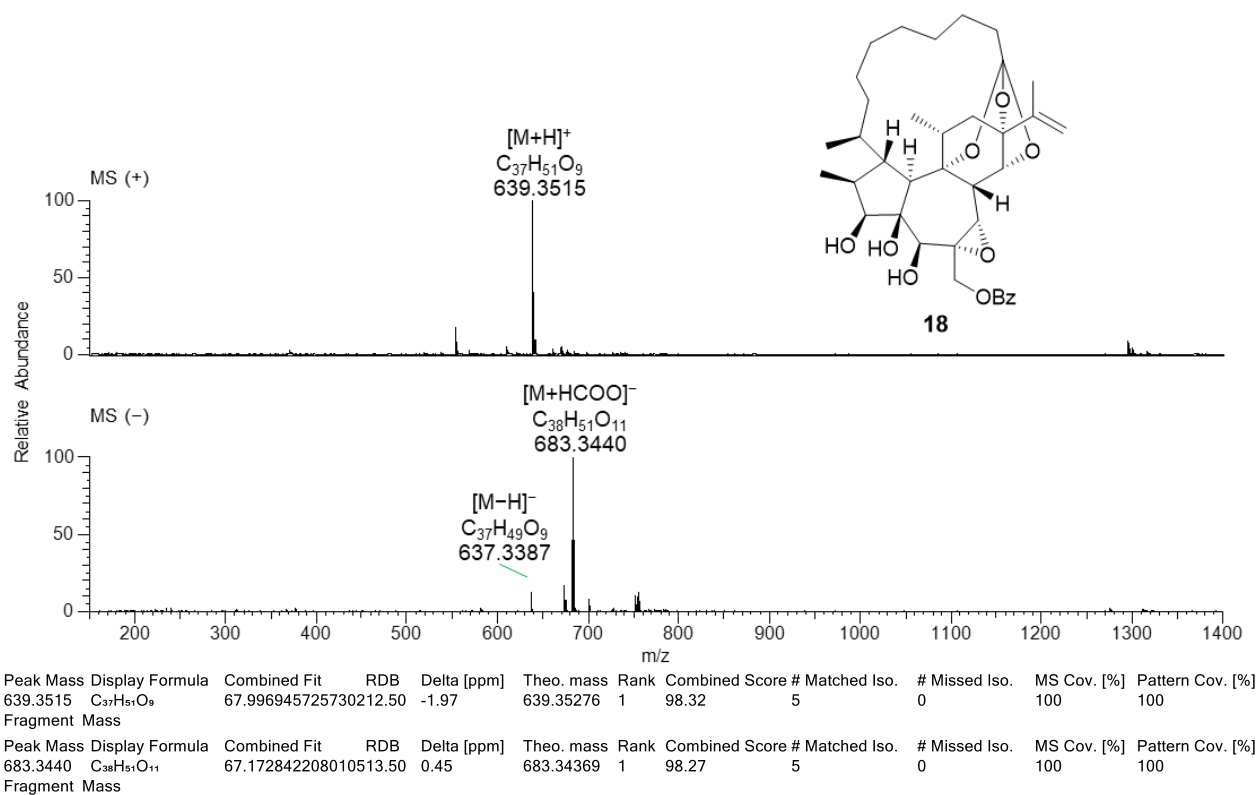

**Figure S15.** HRESIMS data of compound **18** in positive ion mode (upper) and negative ion mode (lower).

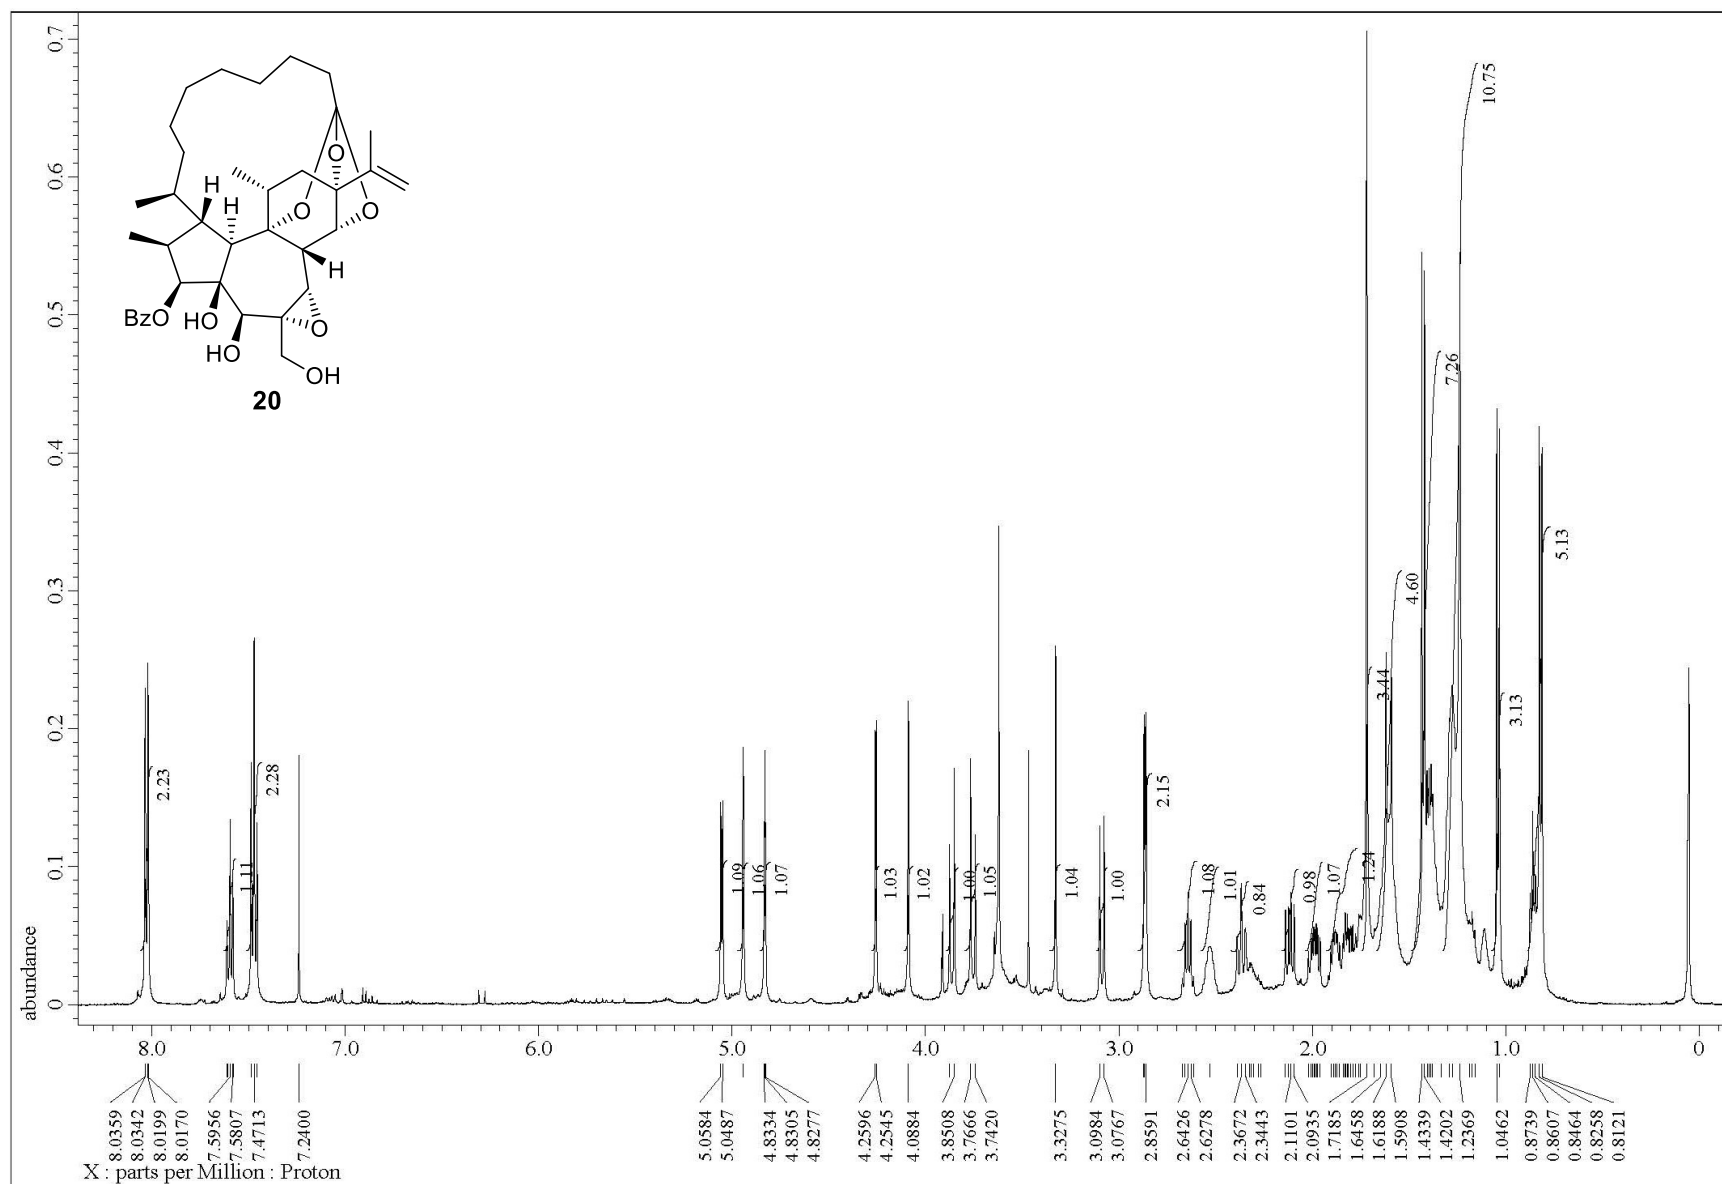

Figure S16.  $^1\text{H}$ -NMR spectrum of compound 20.

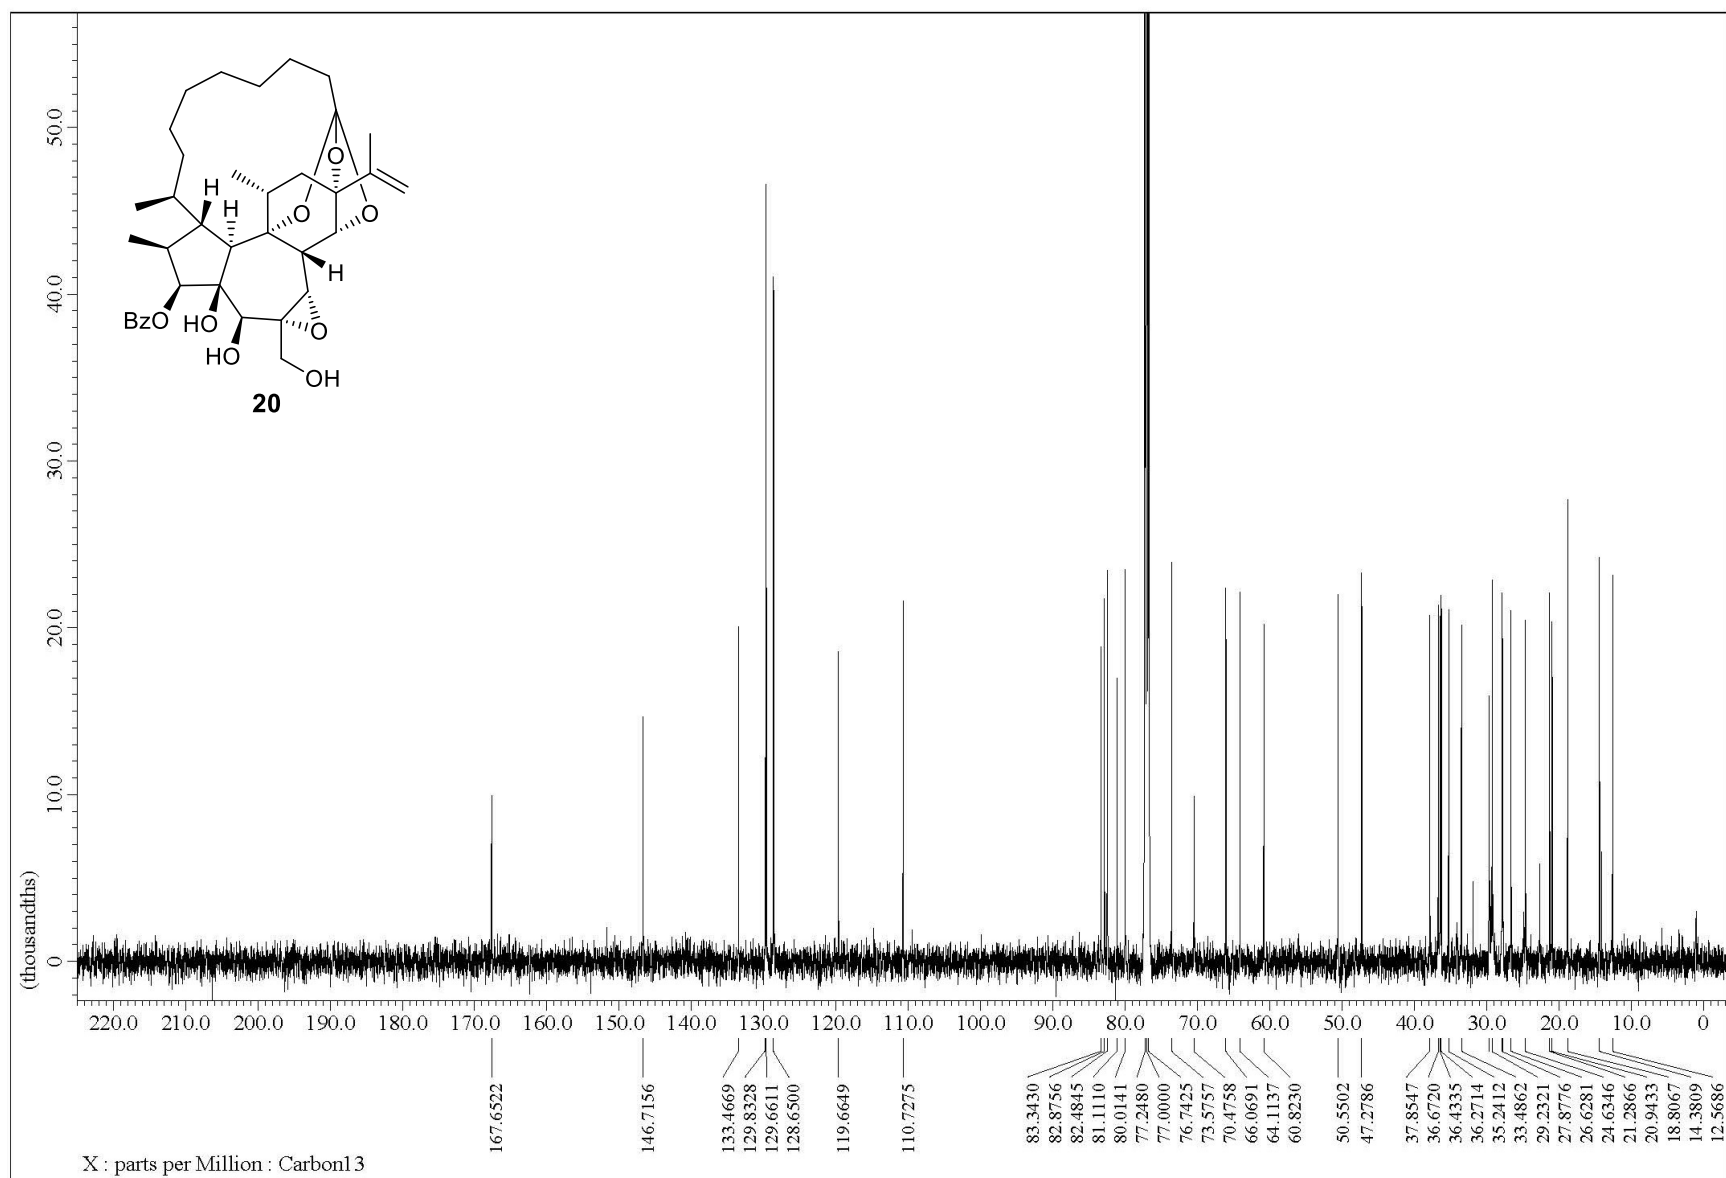

**Figure S17.**  $^{13}\text{C}$ -NMR spectrum of compound **20**.

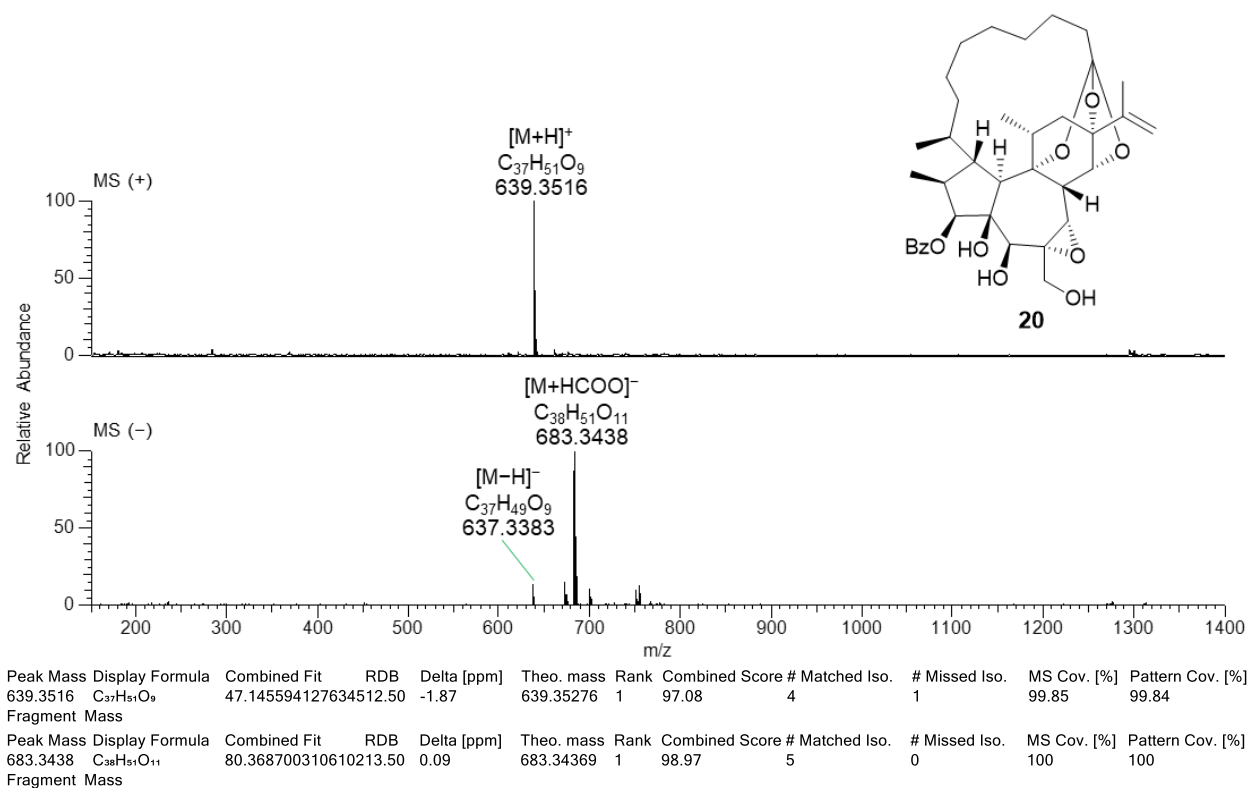

**Figure S18.** HRESIMS data of isolated compound **20** in positive ion mode (upper) and negative ion mode (lower).



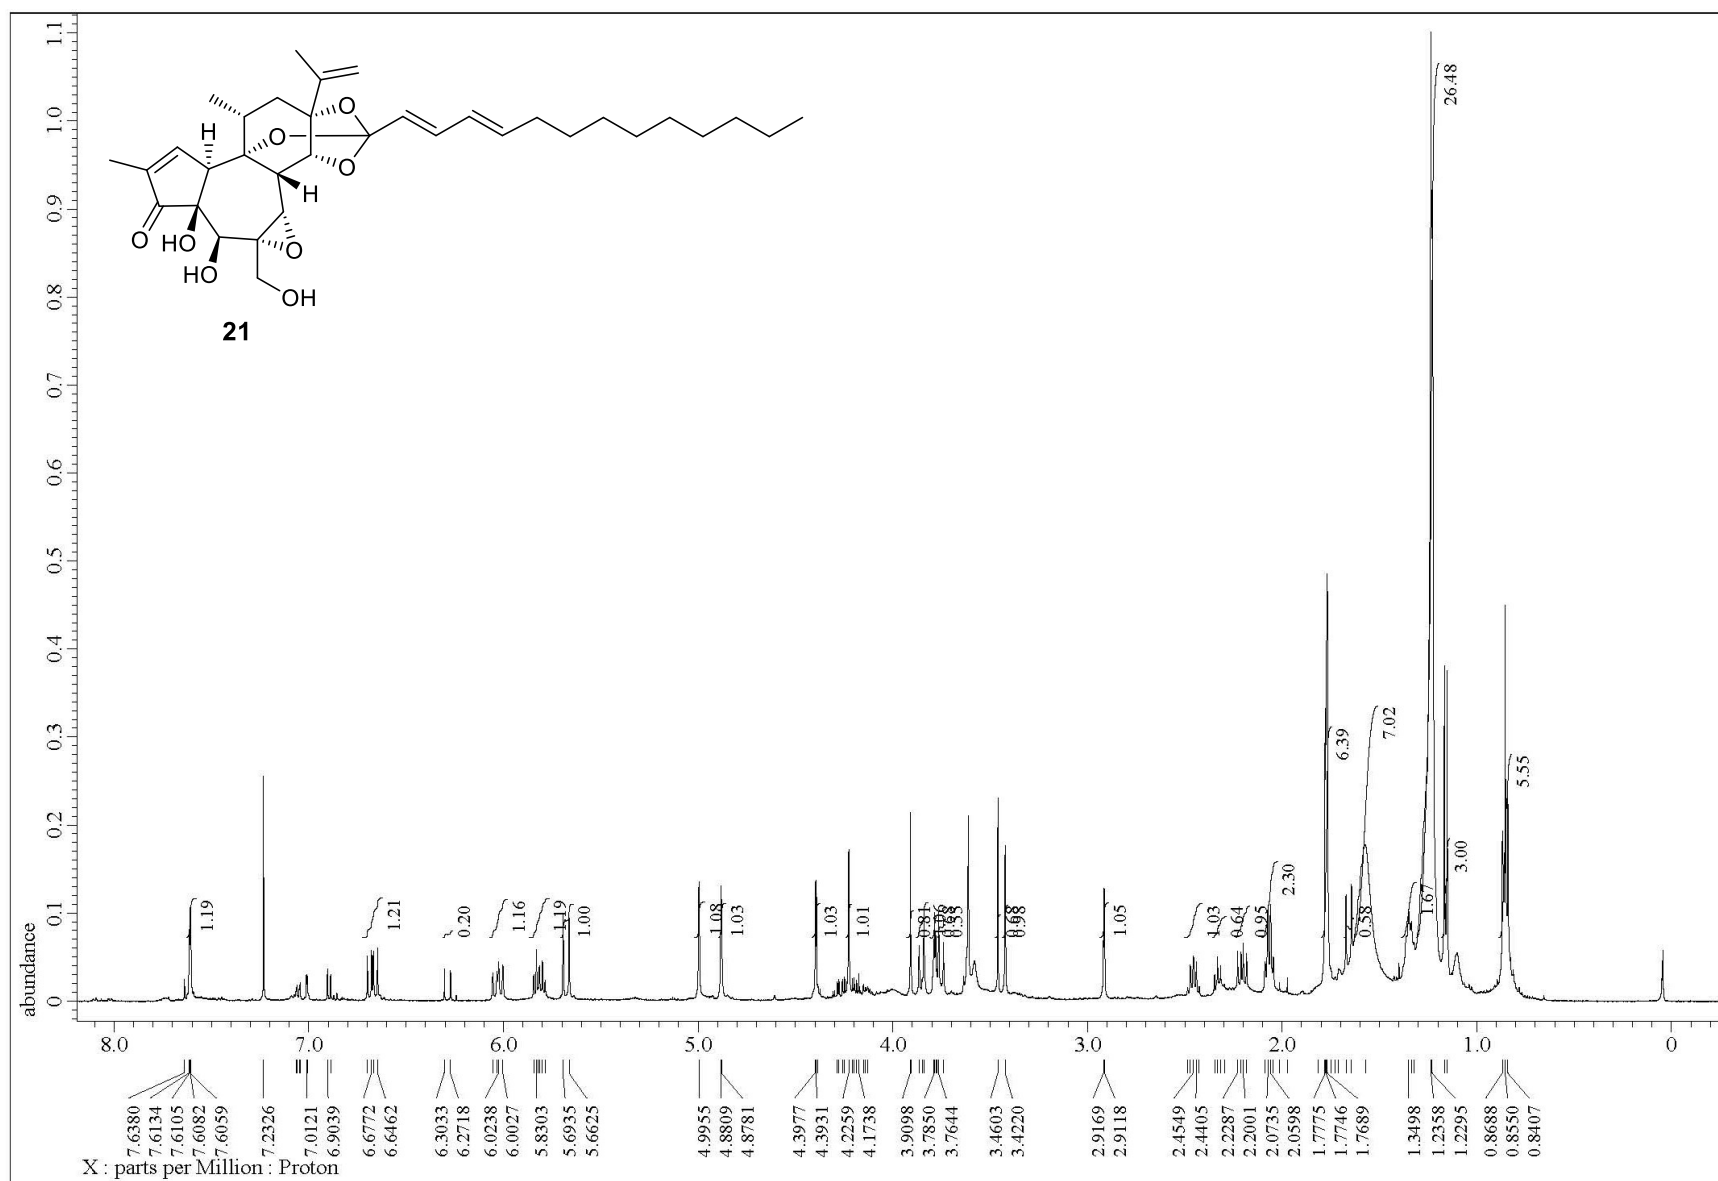

Figure S19.  $^1\text{H}$ -NMR spectrum of compound 21.

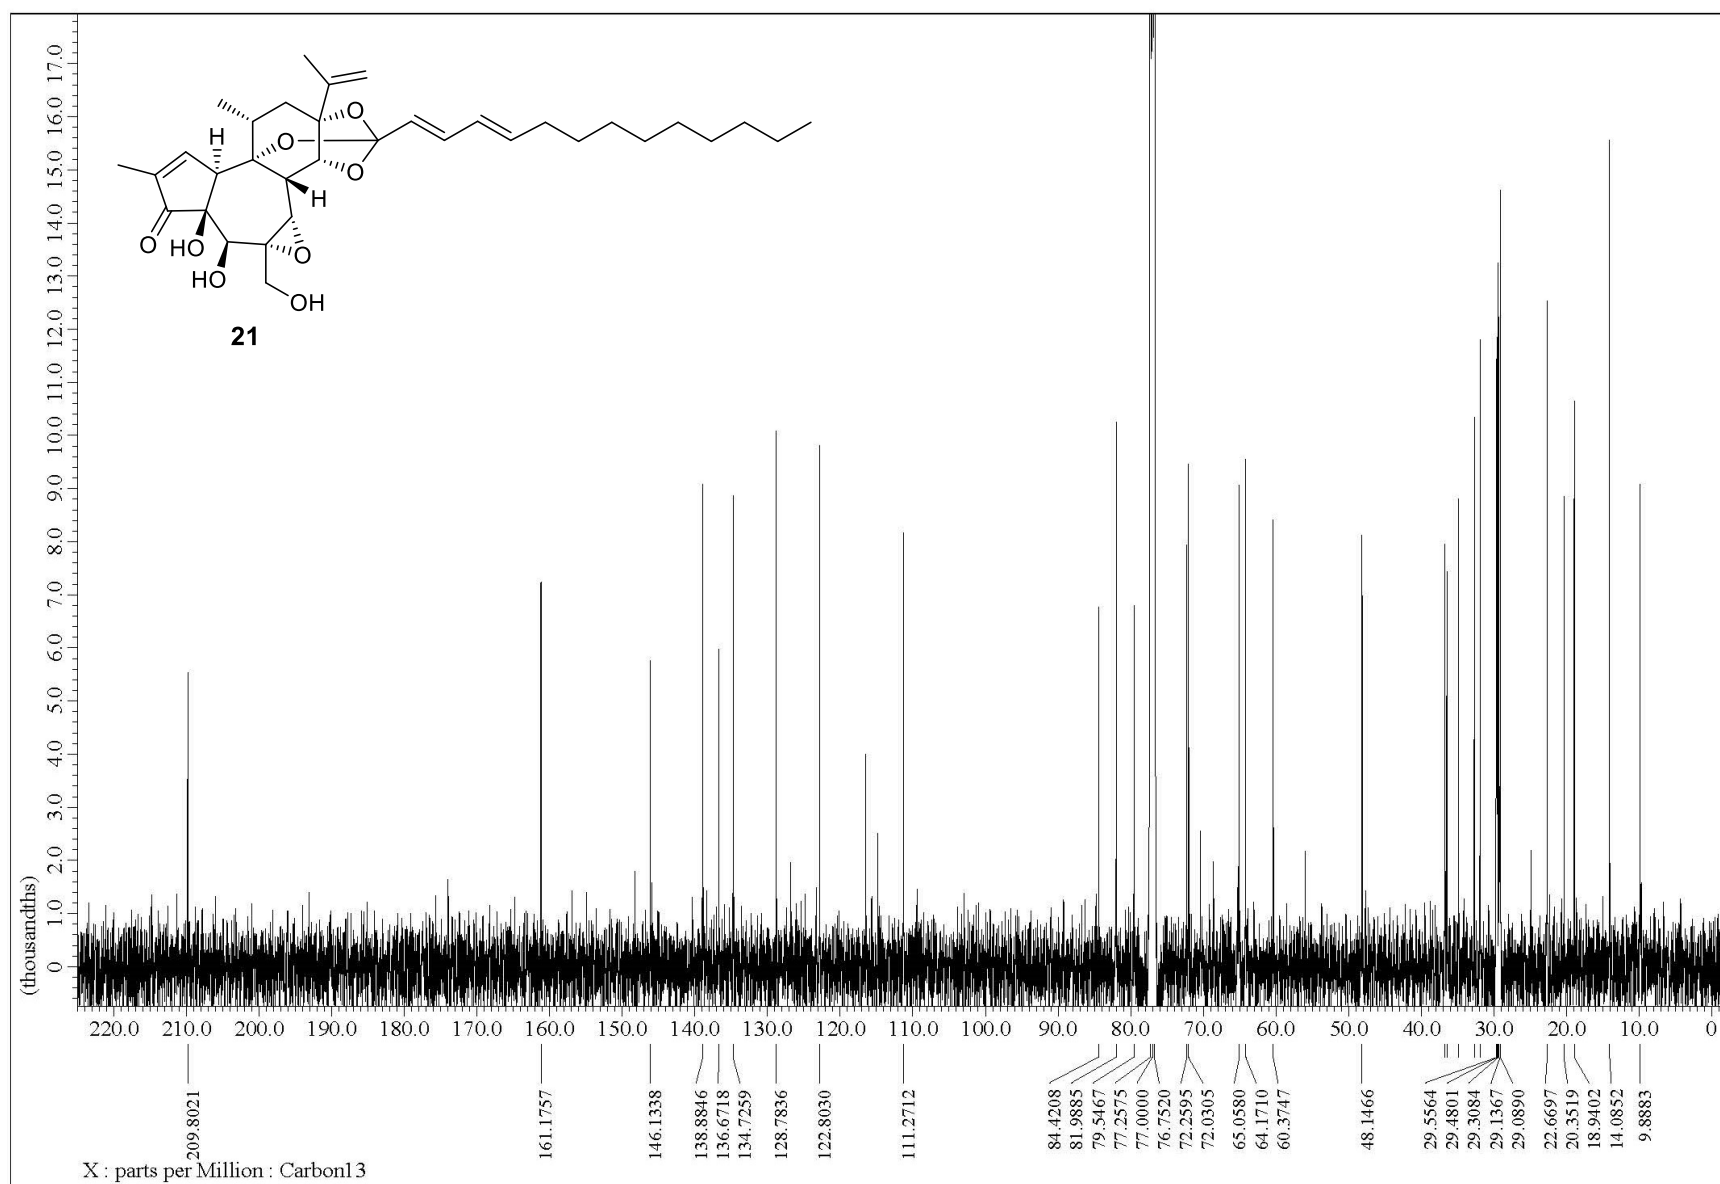

**Figure S20.**  $^{13}\text{C}$ -NMR spectrum of compound **21**.

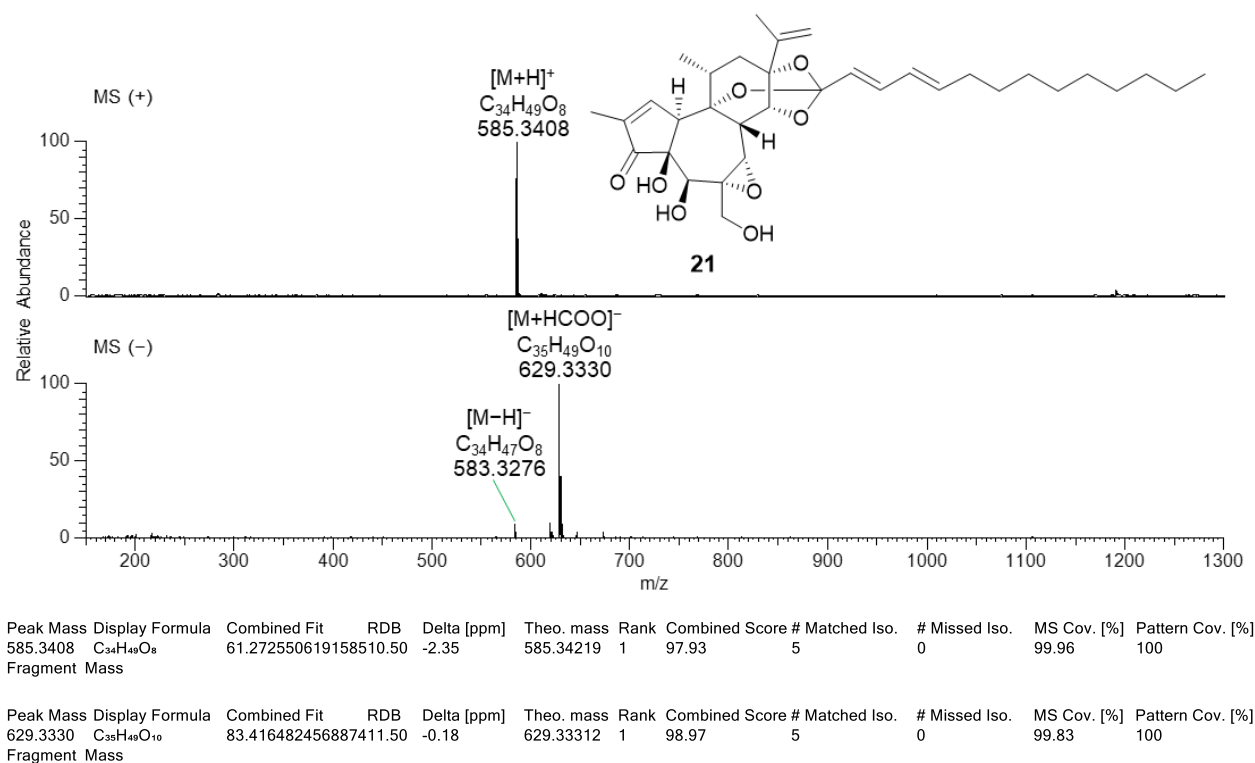

**Figure S21.** HRESIMS data of compound **21** in positive ion mode (upper) and negative ion mode (lower).

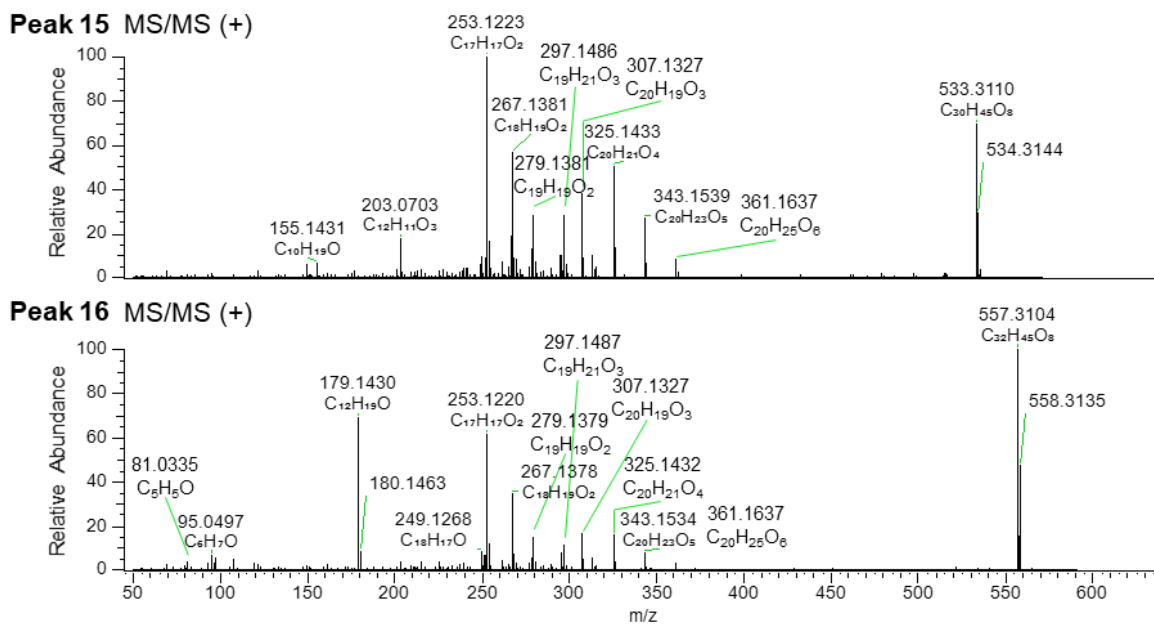

**Figure S22.** Product ion spectra of peaks **15** and **16** obtained from the protonated molecular ion peak in positive ion mode.

**Peak 21**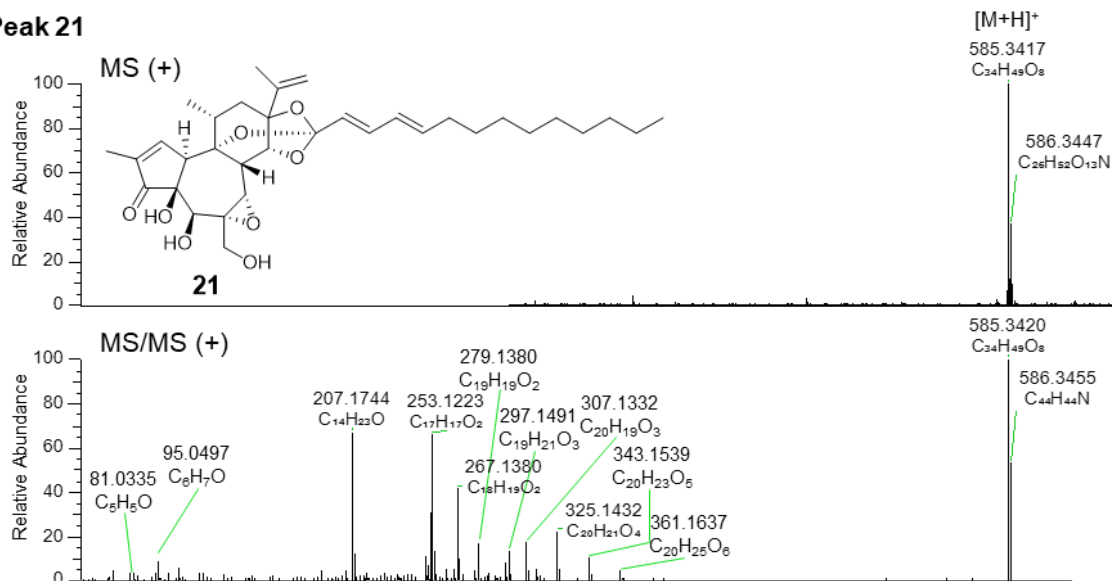**Peak 3**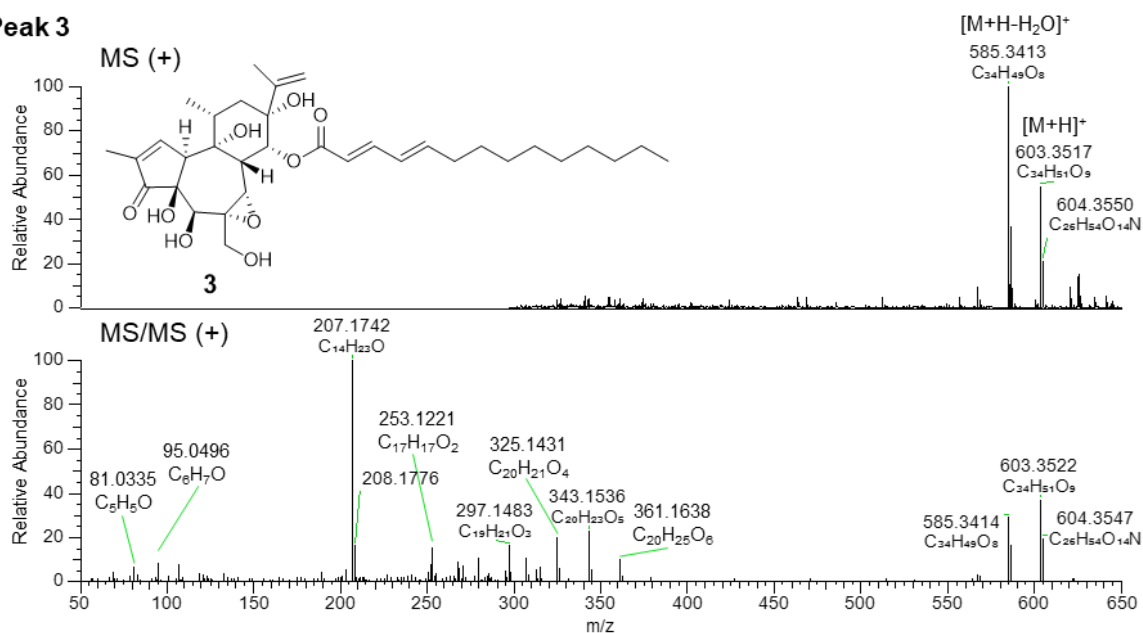

**Figure S23.** Mass spectra and product ion spectra of peaks **21** and **3** obtained from the protonated molecular ion peak in positive ion mode.

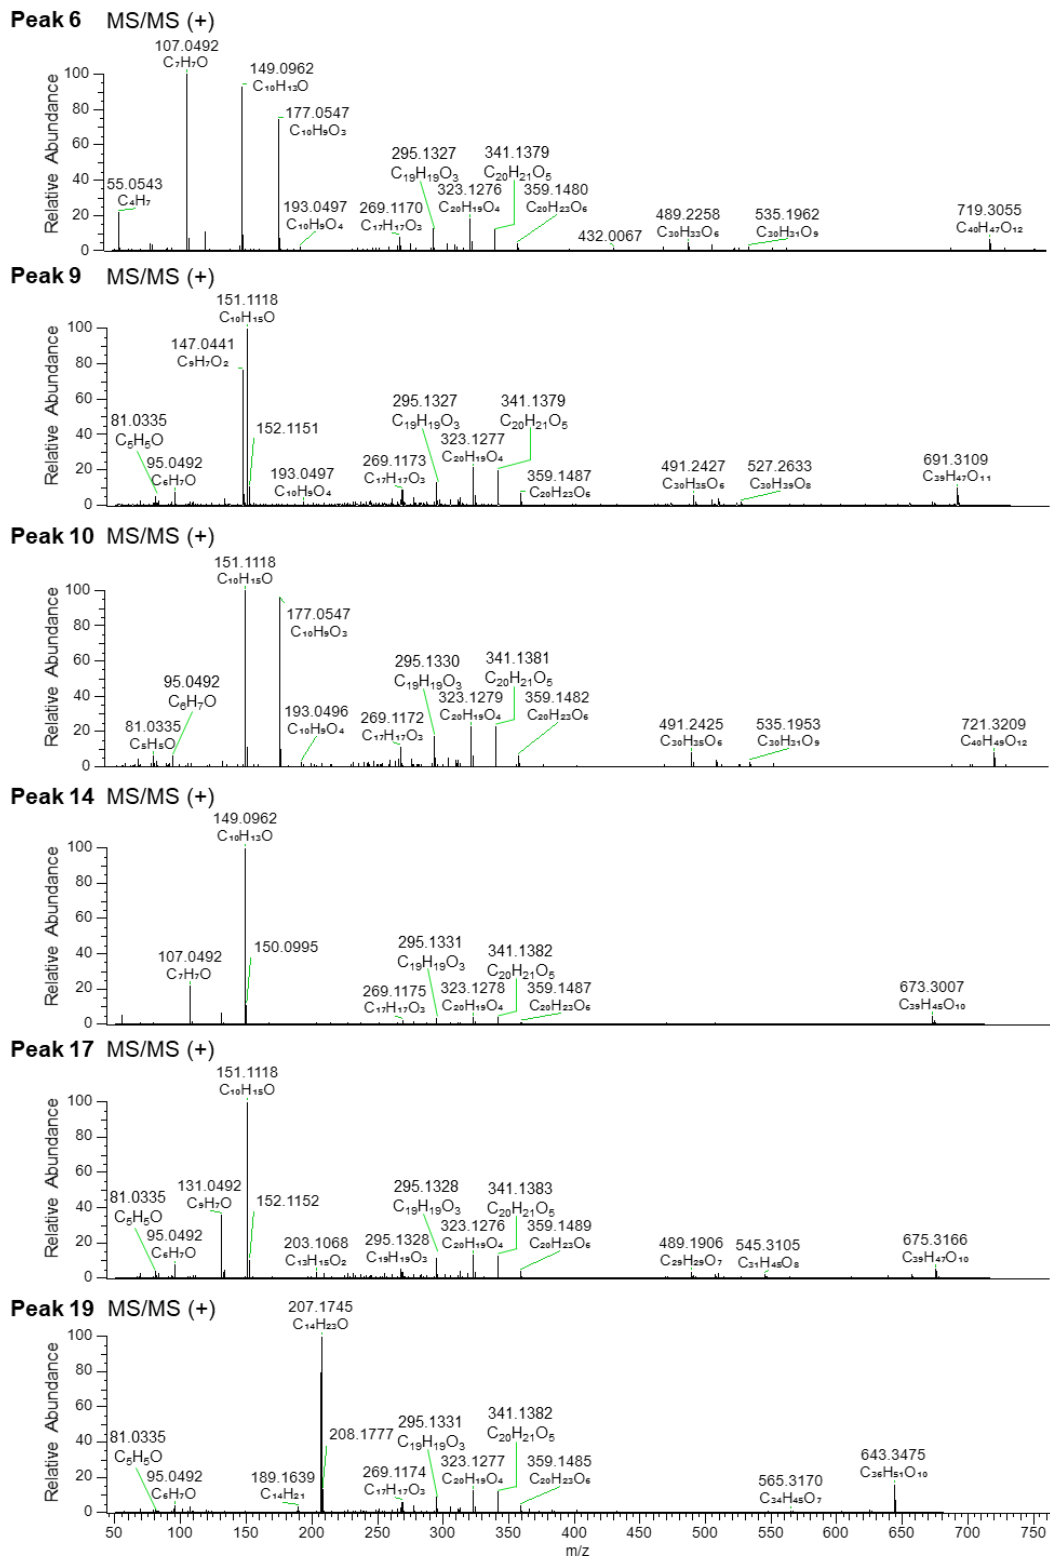

**Figure S24.** Product ion spectra of peaks 6, 9, 10, 14, 17, and 19 obtained from the protonated molecular ion peak in positive ion mode.

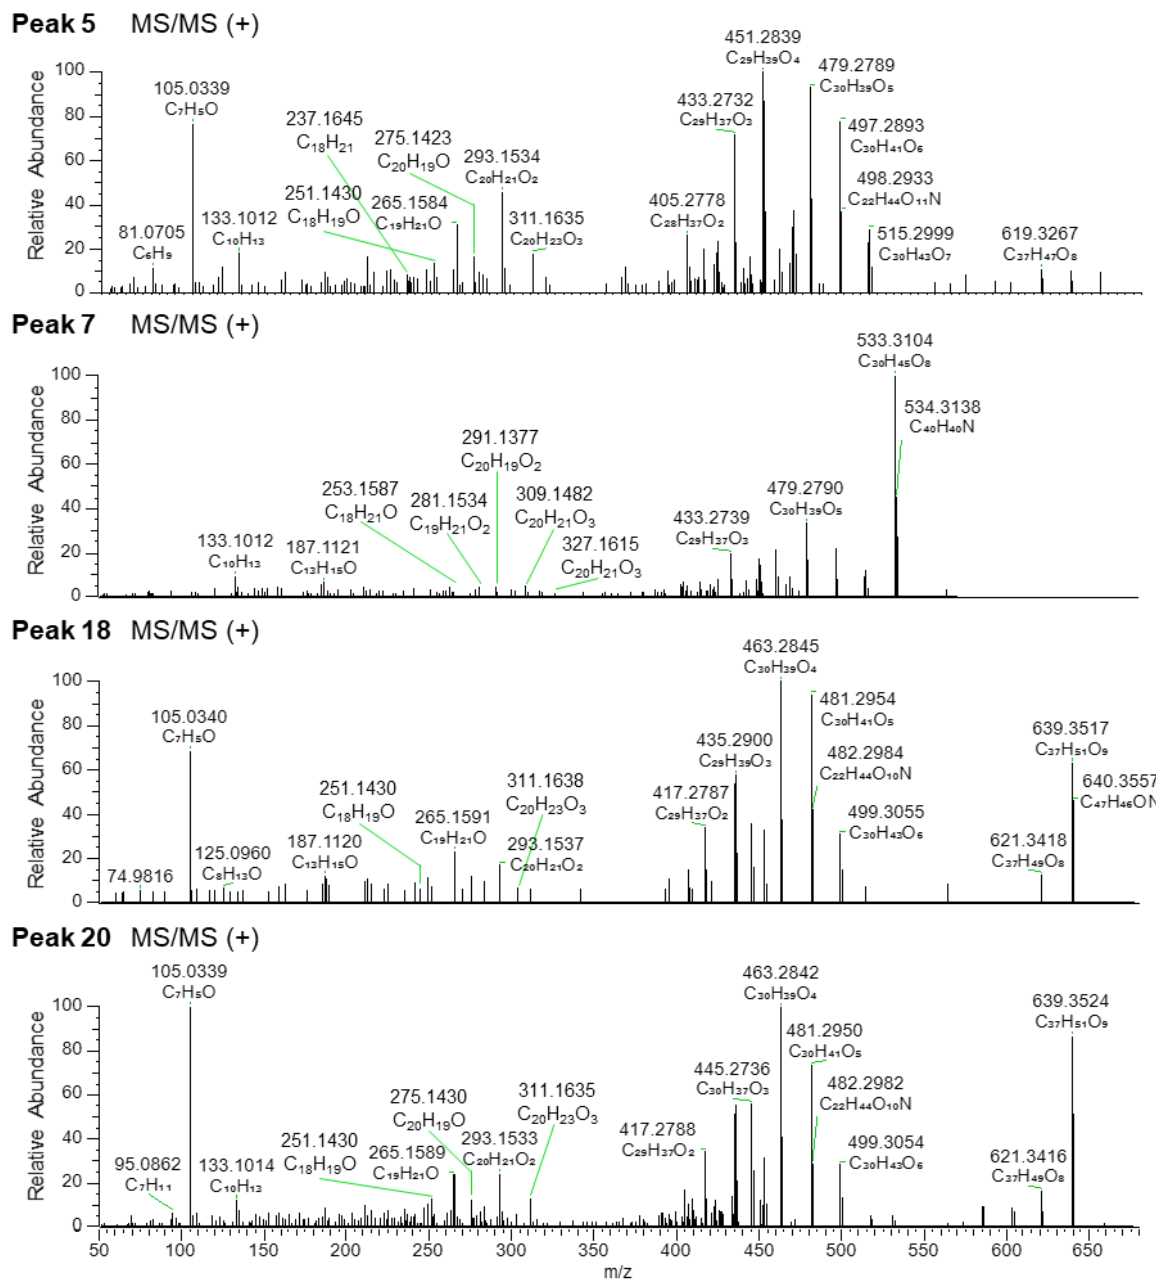

**Figure S25.** Product ion spectra of peaks **5**, **7**, **18**, and **20** obtained from the protonated molecular ion peak in positive ion mode.

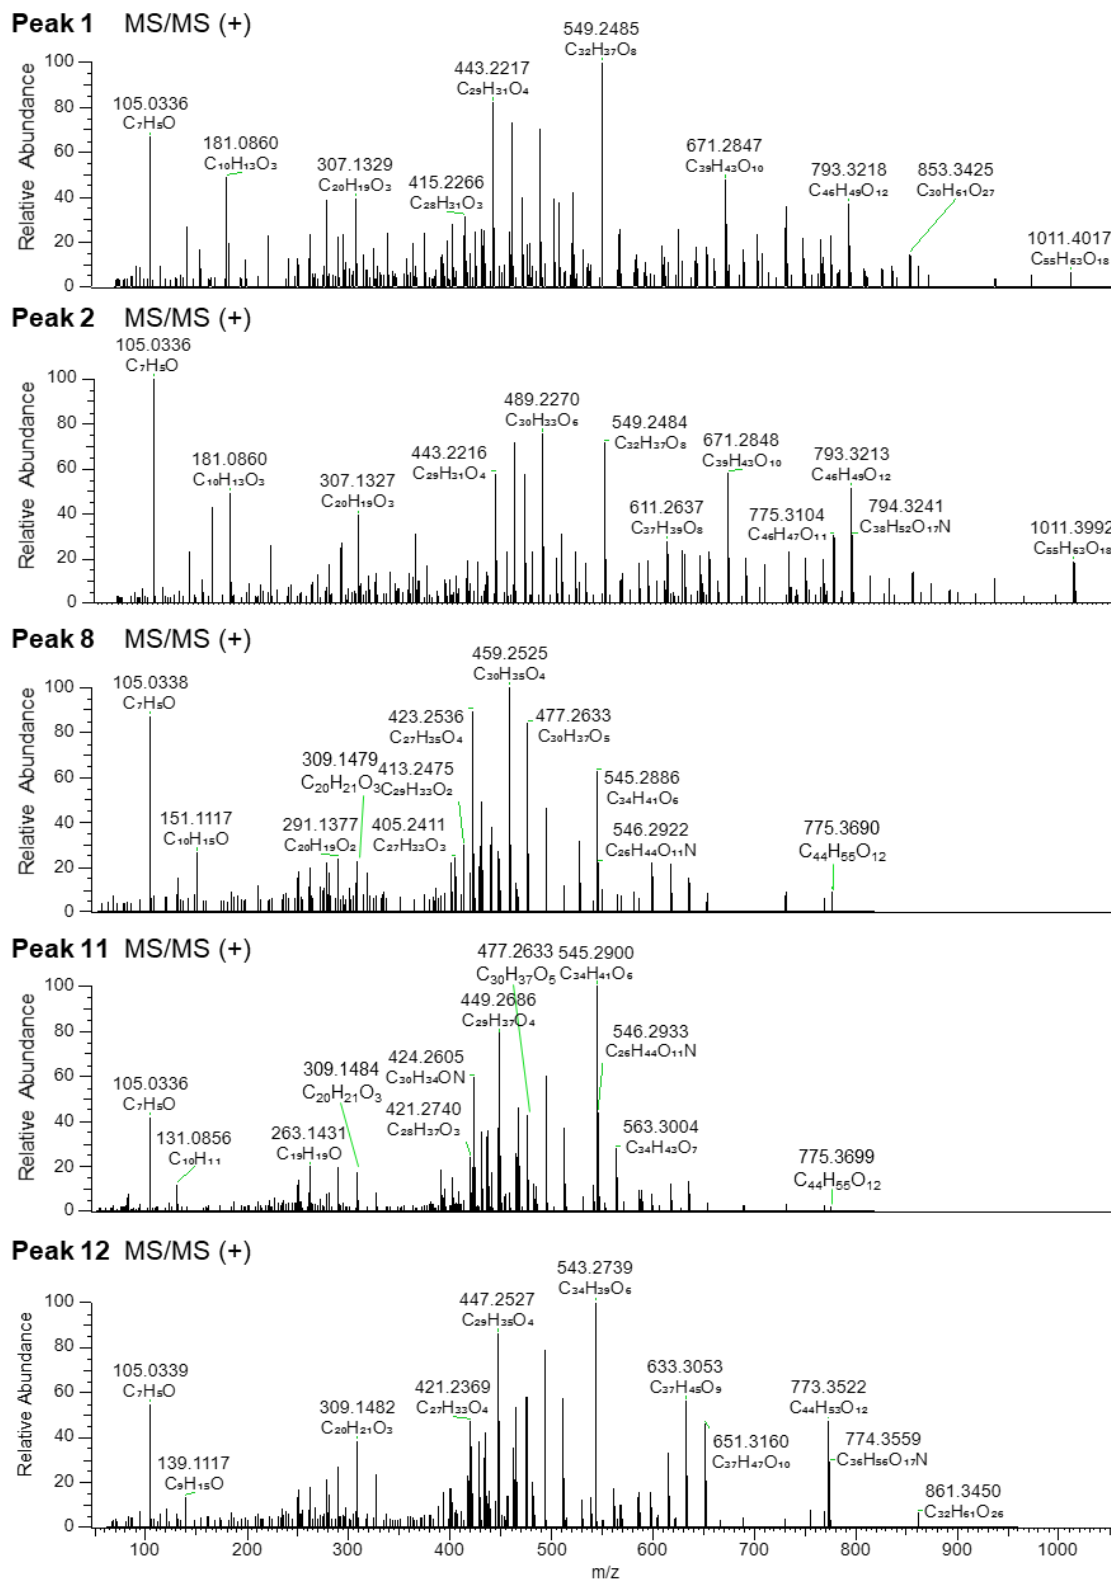

**Figure S26.** Product ion spectra of peaks **1**, **2**, **8**, and **11** obtained from the protonated molecular ion peak and **12** in obtained from the ammonium adduct ion peak positive ion mode.



**Peak 4 MS/MS (+)**

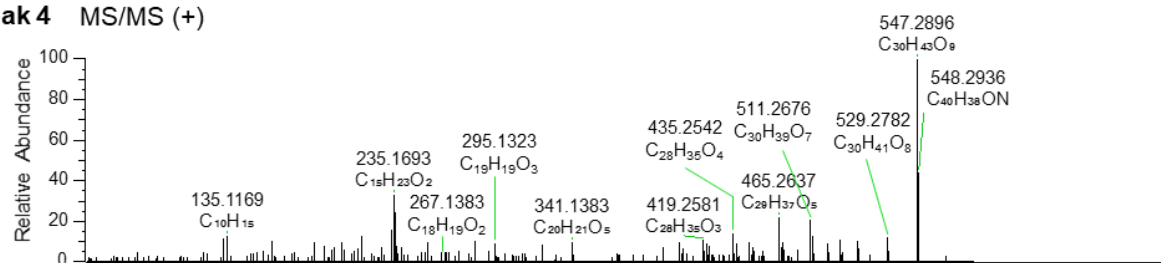

**Peak 13 MS/MS (+)**

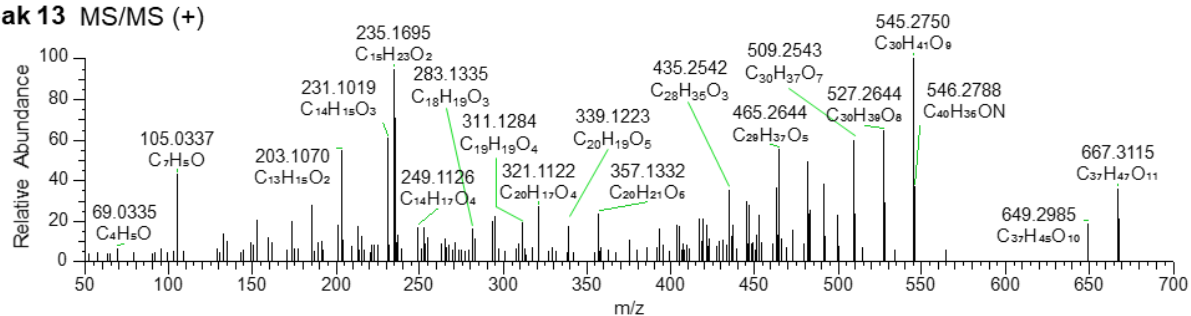

**Figure S27.** Product ion spectra of peaks **4** and **13** obtained from the protonated molecular ion peak.
